# Supplementary material for: Deployment expectations of multi-gigaton scale of carbon dioxide removal could have adverse impacts on global climate system
Source: Research Square preprint supplement (doi:10.21203/rs.3.rs-3593971/v1), 2023-12-06
Supplement: Supplementary file 1 [file ebe87b40a70cf73a4290d475.docx]

**Supplementary Information**

**Deployment expectations of multi-gigaton scale of carbon dioxide removal could have adverse impacts on global climate system**

Jeffrey Dankwa Ampah1 a, Haifeng Liu1,a*, Chao Jin2,a, Mingfa Yao1,a

Sandylove Afrane2, Humphrey Adun3, Jay Fuhrman4, David T. Ho5, Haewon McJeon4,6

1 State Key Laboratory of Engines, Tianjin University, 300072 Tianjin, China

2 School of Environmental Science and Engineering, Tianjin University, 300072 Tianjin, China

3 Energy Systems Engineering Department, Cyprus International University, Haspolat-Lefkosa, Mersin 10, Turkey

4 Joint Global Change Research Institute, University of Maryland and Pacific Northwest National Laboratory, College Park, MD, USA

5 Department of Oceanography, University of Hawaii at Mānoa, 1000 Pope Road, Honolulu, Hawaii 96822, USA

6 KAIST Graduate School of Green Growth & Sustainability, Daejeon 34141, Korea

aAuthors have equally contributed to the work, and can be regarded as equal co-first authors

*Corresponding author: Haifeng Liu (haifengliu@tju.edu.cn)

Contents

[List of Supplementary Figures 2](#_Toc149141510)

[List of Supplementary Tables 3](#_Toc149141511)

[1. Supplementary Figures 4](#_Toc149141512)

[1.1 Energy-related 4](#_Toc149141513)

[1.2 Land-water-fertilizer-food-related 13](#_Toc149141514)

[1.3 Emissions-related 15](#_Toc149141515)

[1.4 Socio-economics 17](#_Toc149141516)

[2. Detailed discussion of results 19](#_Toc149141517)

[2.1 Impact on primary and final energy demand, abatement costs 19](#_Toc149141518)

[2.2 Impact on positive and negative emissions, net zero timing, pollutants 23](#_Toc149141519)

[2.3 Impact on land, water, fertilizer consumption 27](#_Toc149141520)

[2.4 Global implications as a result of high reliance on CDR (Effect of early or delayed climate ambitions from Asia) 30](#_Toc149141521)

[3. Model parameterization and underlying equations for demand and supply 33](#_Toc149141522)

[4. References 54](#_Toc149141523)

# List of Supplementary Figures

[Fig. S 1 Final energy demand by individual Asian country/region 4](#_Toc149149413)

[Fig. S 2 Electricity production by individual Asian country/region 5](#_Toc149149414)

[Fig. S 3 Refined liquids production by individual Asian country/region 5](#_Toc149149415)

[Fig. S 4 Hydrogen production by individual Asian country/region 6](#_Toc149149416)

[Fig. S 5 Consumption of biomass by individual Asian country/region 6](#_Toc149149417)

[Fig. S 6 Purpose-grown biomass production by individual Asian country/region 7](#_Toc149149418)

[Fig. S 7 Municipal solid waste production by individual Asian country/region 7](#_Toc149149419)

[Fig. S 8 Total gas production by source in Asia 8](#_Toc149149420)

[Fig. S 9 Average final energy prices in Asia 8](#_Toc149149421)

[Fig. S 10 Average regional primary energy prices in Asia 9](#_Toc149149422)

[Fig. S 11 Average electricity prices by sector in Asia 9](#_Toc149149423)

[Fig. S 12 Average electricity generation cost by source and technology in Asia (cost of biomass, coal, gas, and refined liquids does not include generation with CCS) 10](#_Toc149149424)

[Fig. S 13 Average refined liquids prices in Asia 10](#_Toc149149425)

[Fig. S 14 Average refined liquids production cost by technology in Asia (cost of FT biofuel, corn ethanol, and coal to liquids does not include generation with CCS) 11](#_Toc149149426)

[Fig. S 15 Average hydrogen production prices in Asia 11](#_Toc149149427)

[Fig. S 16 Average hydrogen production cost by technology in Asia (cost of biomass and coal does not include generation with CCS) 12](#_Toc149149428)

[Fig. S 17 Average gas production cost by source in Asia 12](#_Toc149149429)

[Fig. S 18 Nitrogen fertilizer demand by individual Asian country/region 13](#_Toc149149430)

[Fig. S 19 Fertilizer production by technology in Asia 13](#_Toc149149431)

[Fig. S 20 Total water consumption and withdrawal by power sector 14](#_Toc149149432)

[Fig. S 21 Demand for staple foods in individual Asian country/region 14](#_Toc149149433)

[Fig. S 22 Total net CO2 emissions by individual Asian country/region 15](#_Toc149149434)

[Fig. S 23 Total net CO2 emissions as a result of Asia’s advanced or delayed climate ambitions under high CDR reliance compared to IPPC 1.5 oCscenarios 16](#_Toc149149435)

[Fig. S 24 Total BECCS deployment as a result of Asia’s advanced or delayed climate ambitions under high CDR reliance compared to IPPC 1.5 oCscenarios 16](#_Toc149149436)

[Fig. S 25 Total DACCS deployment as a result of Asia’s advanced or delayed climate ambitions under high CDR reliance compared to IPPC 1.5 oCscenarios 17](#_Toc149149437)

[Fig. S 26 Population projection by SSP2 17](#_Toc149149438)

[Fig. S 27 GDP projection by SSP2 18](#_Toc149149439)

[Fig. S 28 Enhanced weathering supply curves for GCAM regions(a) 47](#_Toc149149440)

[Fig. S 29 Enhanced weathering supply curves for GCAM regions (b) 47](#_Toc149149441)

# List of Supplementary Tables

[Table S 1 Fraction of CO2 captured by transformation technologies 32](#_Toc149149442)

[Table S 2 Primary energy transformation technologies default cost assumptions (1975$/GJ) 33](#_Toc149149443)

[Table S 3 Electricity technology capacity factors 34](#_Toc149149444)

[Table S 4 Electricity technology capture fractions (portion of CO2 emissions that are captured) 36](#_Toc149149445)

[Table S 5 Electricity technology retirement parameters 37](#_Toc149149446)

[Table S 6 Industrial energy use default efficiencies 41](#_Toc149149447)

[Table S 7 Carbon storage resource supply curve points (2005$/tCO2) 42](#_Toc149149448)

[Table S 8 Calibration values for the CO2 removal sector (MtC) 43](#_Toc149149449)

[Table S 9 CO2 capture rates for DAC and process heat DAC technology 45](#_Toc149149450)

[Table S 10 Parametrizations for DACCS Technologies. 45](#_Toc149149451)

[Table S 11 Enhanced Weathering Cost Adder 48](#_Toc149149452)

[Table S 12 Electrical energy inputs for enhanced weathering 48](#_Toc149149453)

[Table S 13 Electrical Energy Input Derivation for DORCS paired with reverse osmosis desalination. 49](#_Toc149149454)

[Table S 14 Non-fuel costs of DORCS 49](#_Toc149149455)

[Table S 15 Non-energy cost assumptions for DORCS paired with reverse osmosis desalination. 50](#_Toc149149456)

[Table S 16 GCAM Assumptions for Direct Ocean Capture. 50](#_Toc149149457)

[Table S 17 Biochar supply and demand assumptions 51](#_Toc149149458)

# Supplementary Figures

## Energy-related

**
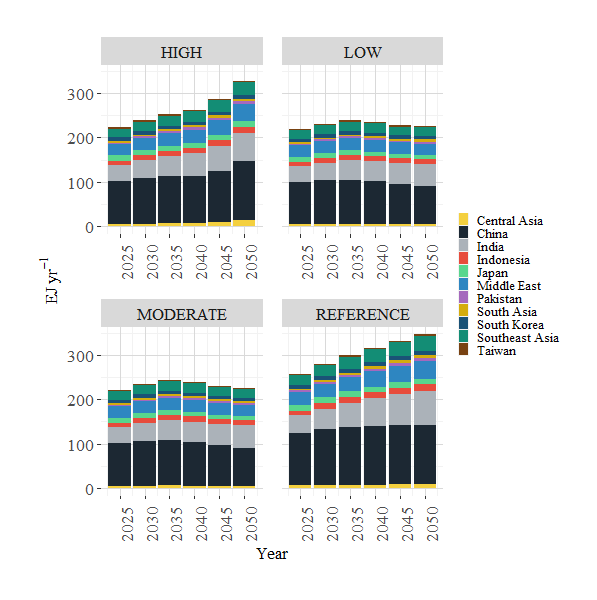
**

Fig. S Final energy demand by individual Asian country/region

**
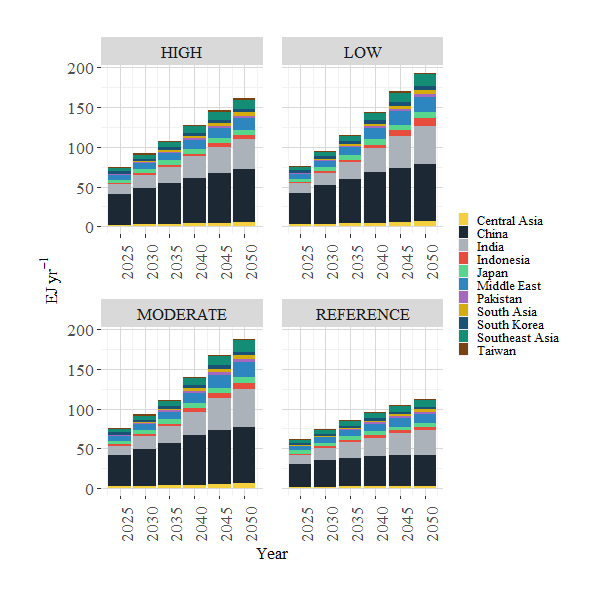
**

Fig. S Electricity production by individual Asian country/region

**
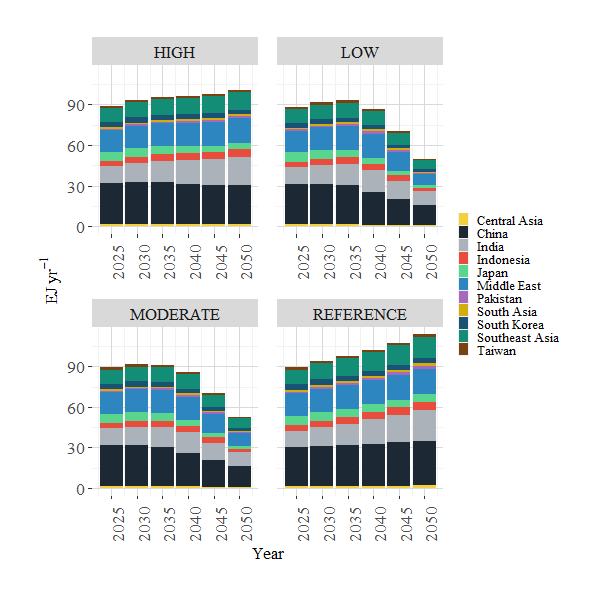
**

Fig. S Refined liquids production by individual Asian country/region

**
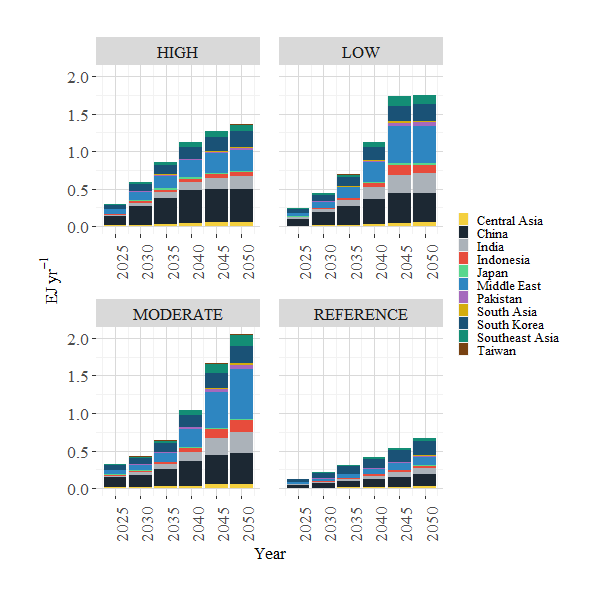
**

Fig. S Hydrogen production by individual Asian country/region

**
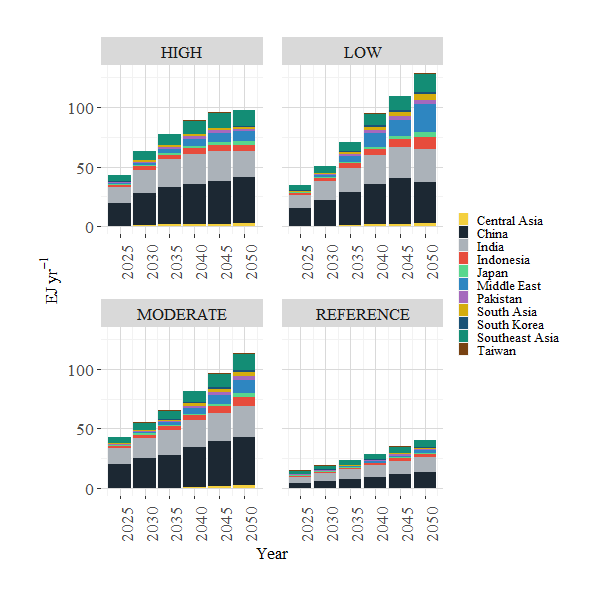
**

Fig. S Consumption of biomass by individual Asian country/region

**
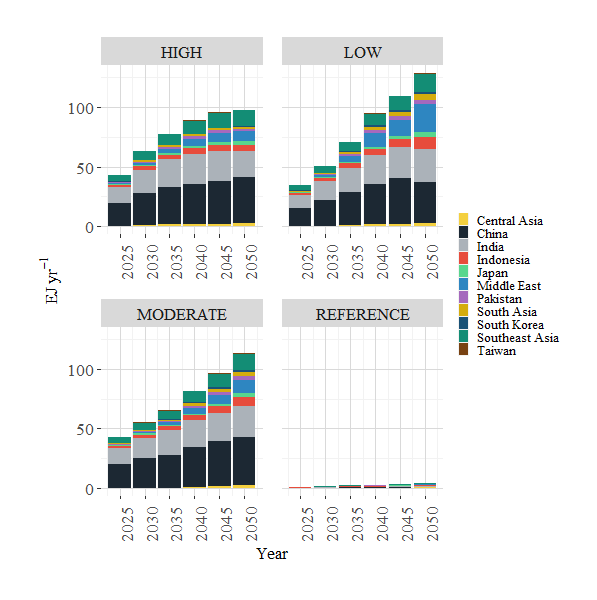
**

Fig. S Purpose-grown biomass production by individual Asian country/region

**
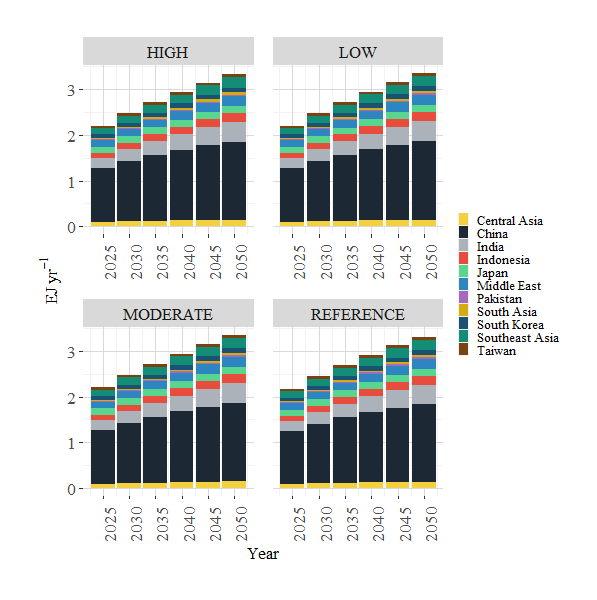
**

Fig. S Municipal solid waste production by individual Asian country/region

**
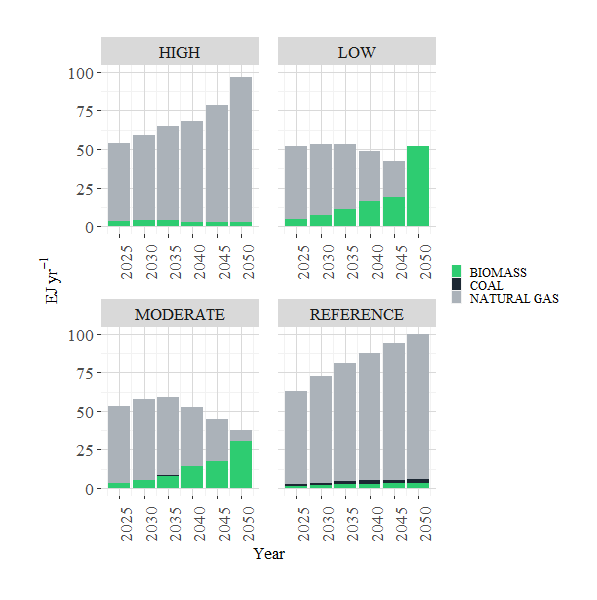
**

Fig. S Total gas production by source in Asia

**
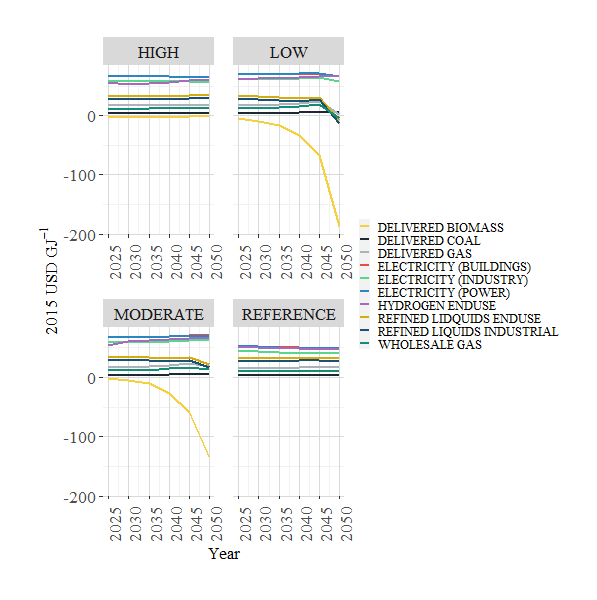
**

Fig. S Average final energy prices in Asia

**
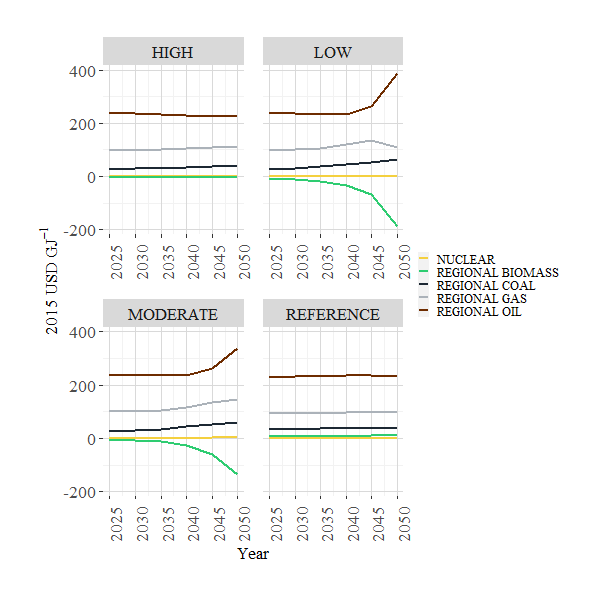
**

Fig. S Average regional primary energy prices in Asia

**
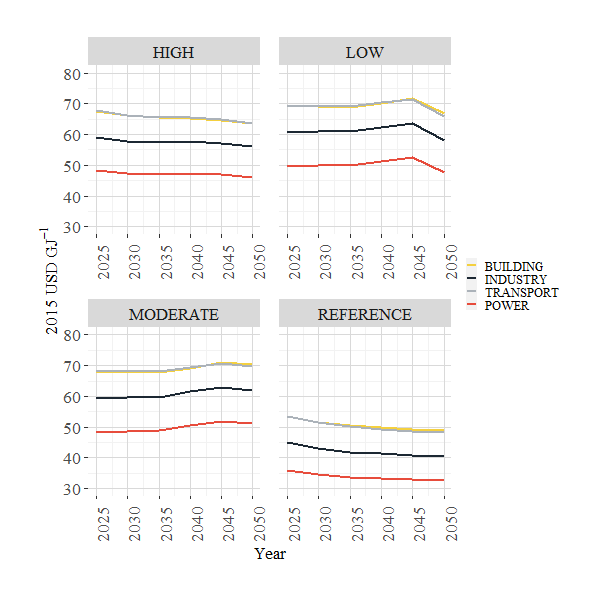
**

Fig. S Average electricity prices by sector in Asia

**
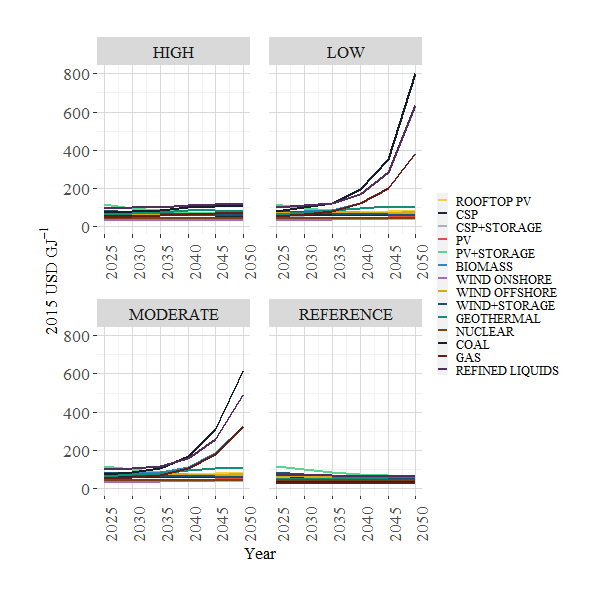
**

Fig. S Average electricity generation cost by source and technology in Asia (cost of biomass, coal, gas, and refined liquids does not include generation with CCS)

**
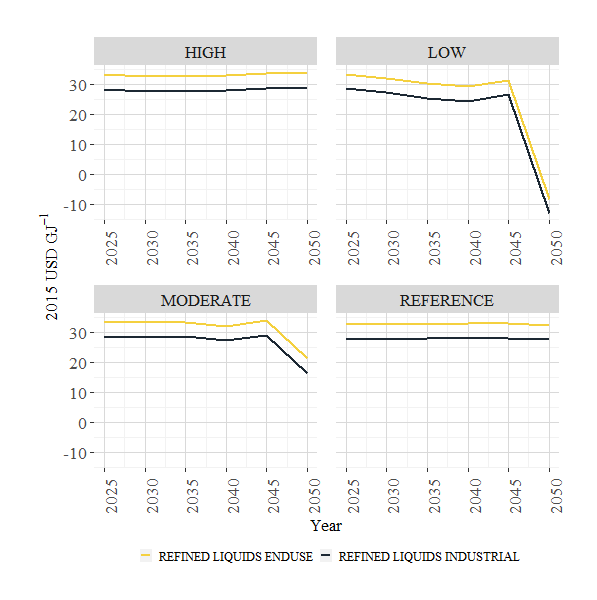
**

Fig. S Average refined liquids prices in Asia

**
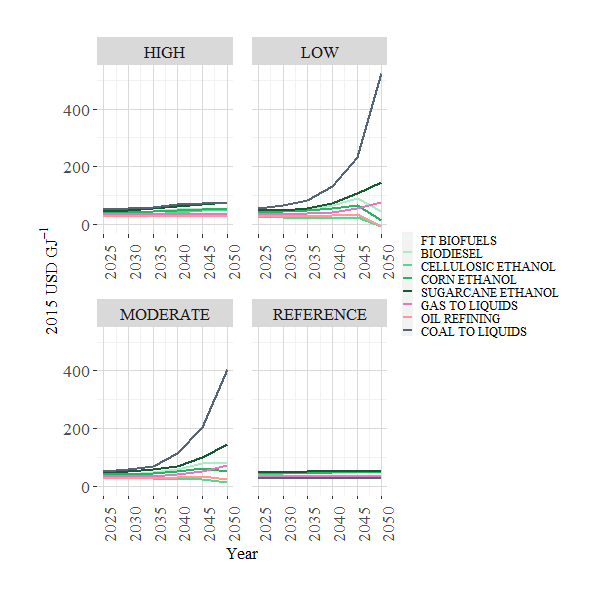
**

Fig. S Average refined liquids production cost by technology in Asia (cost of FT biofuel, corn ethanol, and coal to liquids does not include generation with CCS)

**
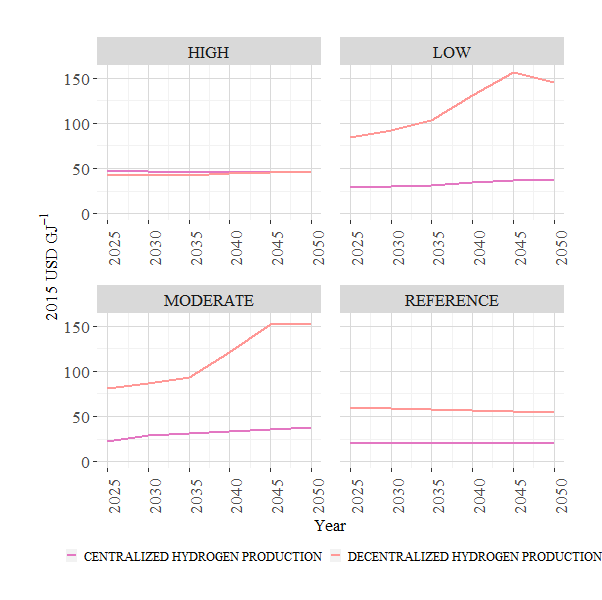
**

Fig. S Average hydrogen production prices in Asia

**
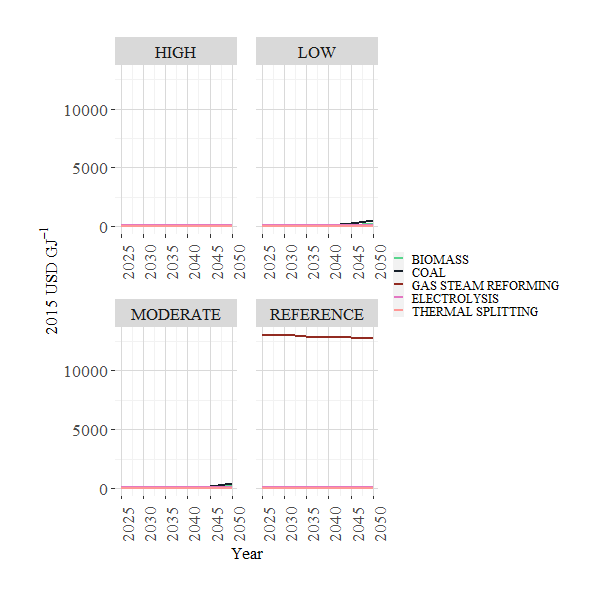
**

Fig. S Average hydrogen production cost by technology in Asia (cost of biomass and coal does not include generation with CCS)

**
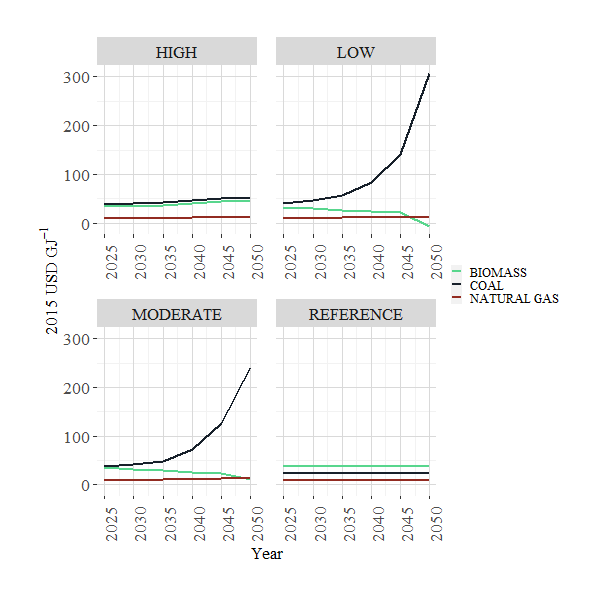
**

Fig. S Average gas production cost by source in Asia

## Land-water-fertilizer-food-related

**
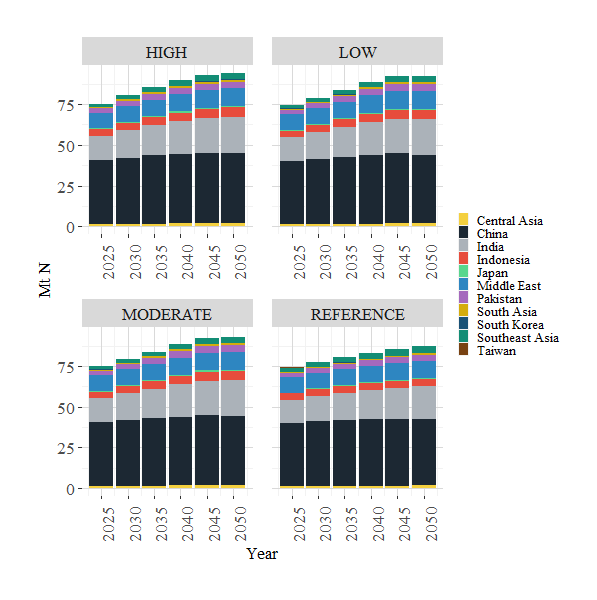
**

Fig. S Nitrogen fertilizer demand by individual Asian country/region

**
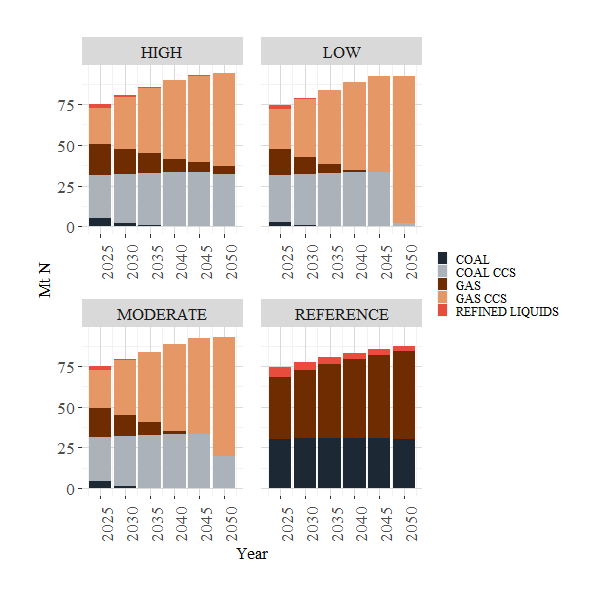
**

Fig. S Fertilizer production by technology in Asia

**
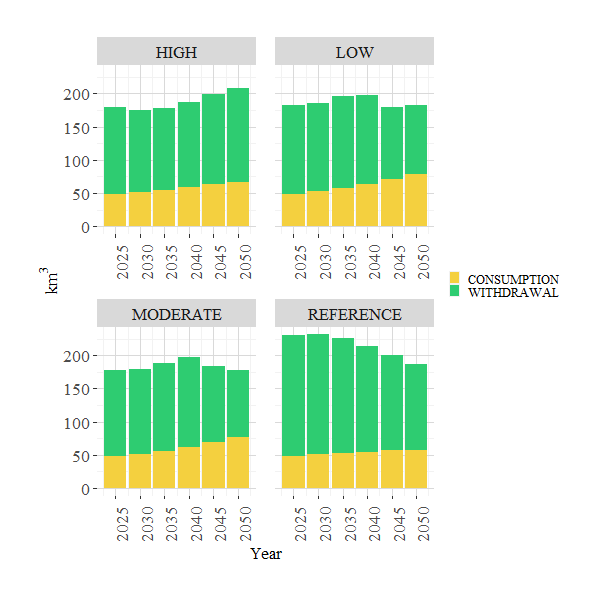
**

Fig. S Total water consumption and withdrawal by power sector

**
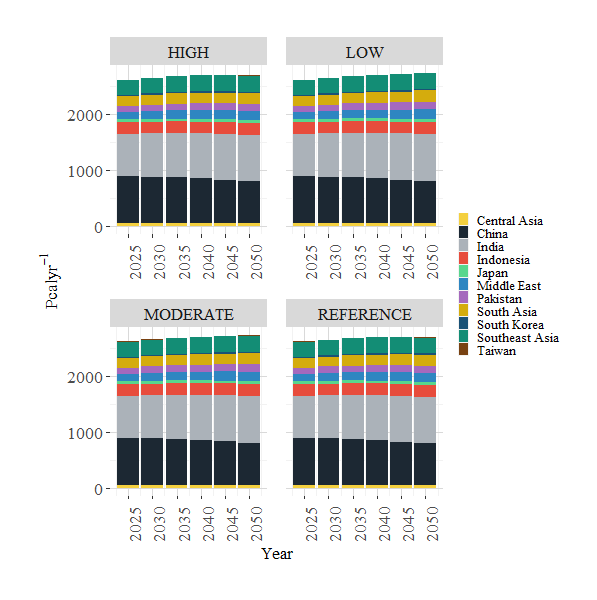
**

Fig. S Demand for staple foods in individual Asian country/region

## Emissions-related

**
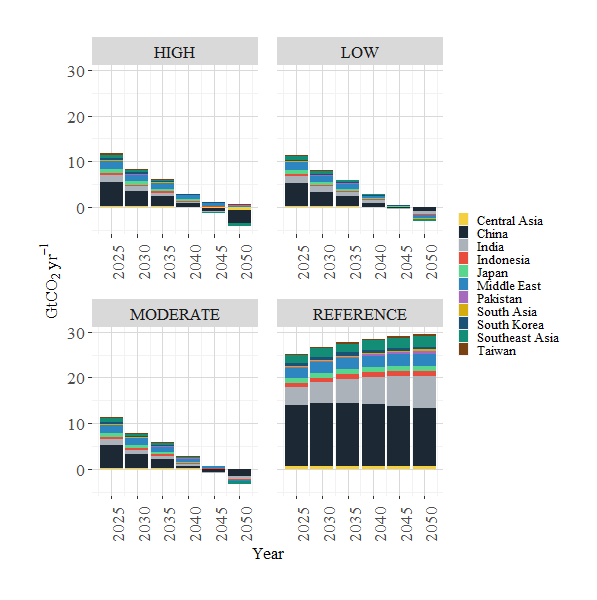
**

Fig. S Total net CO2 emissions by individual Asian country/region

Results in Fig. S23-25 are representing current study’s results against previous scenarios assessed by the IPCC. Here, our results are compared with the AR6 results obtained from the AR6 Scenario Explorer hosted by IIASA 1. The previous scenarios contain several results from different IAM models from different research teams (78 scenarios across 24 models). The pathway in these previous scenarios is one that limits warming to 1.5 oC by 2100 with no or limited overshoot (C1 category)

**
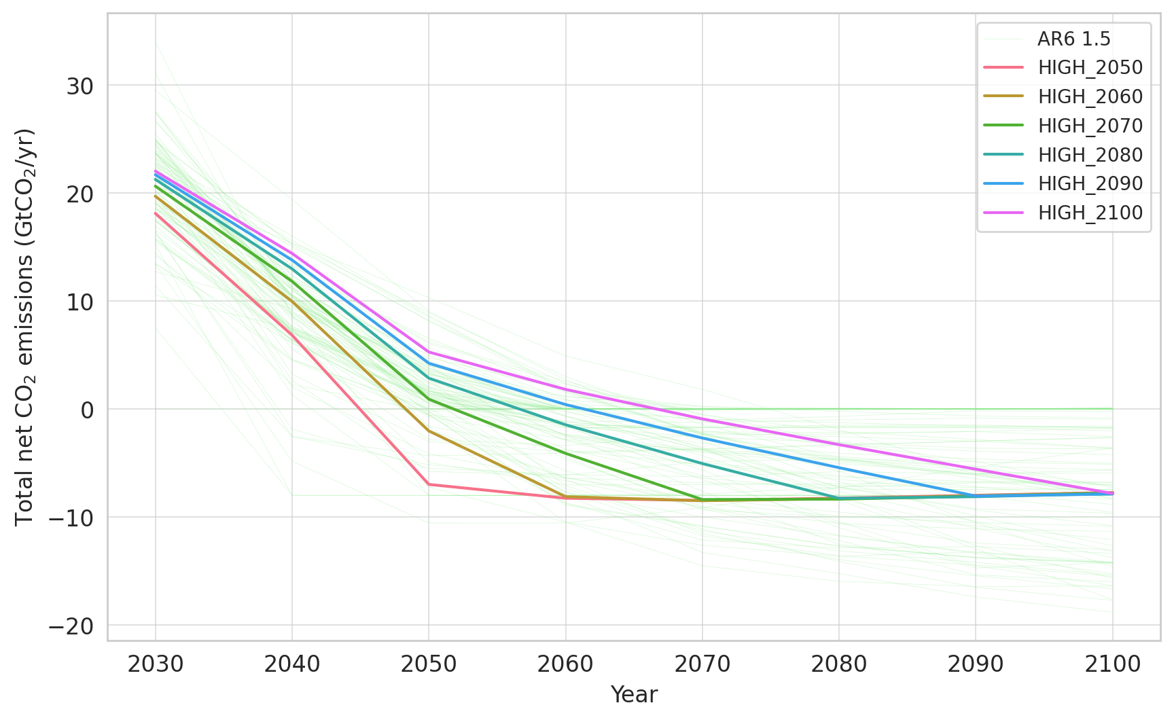
**

Fig. S Total net CO2 emissions as a result of Asia’s advanced or delayed climate ambitions under high CDR reliance compared to IPPC 1.5 oCscenarios

**
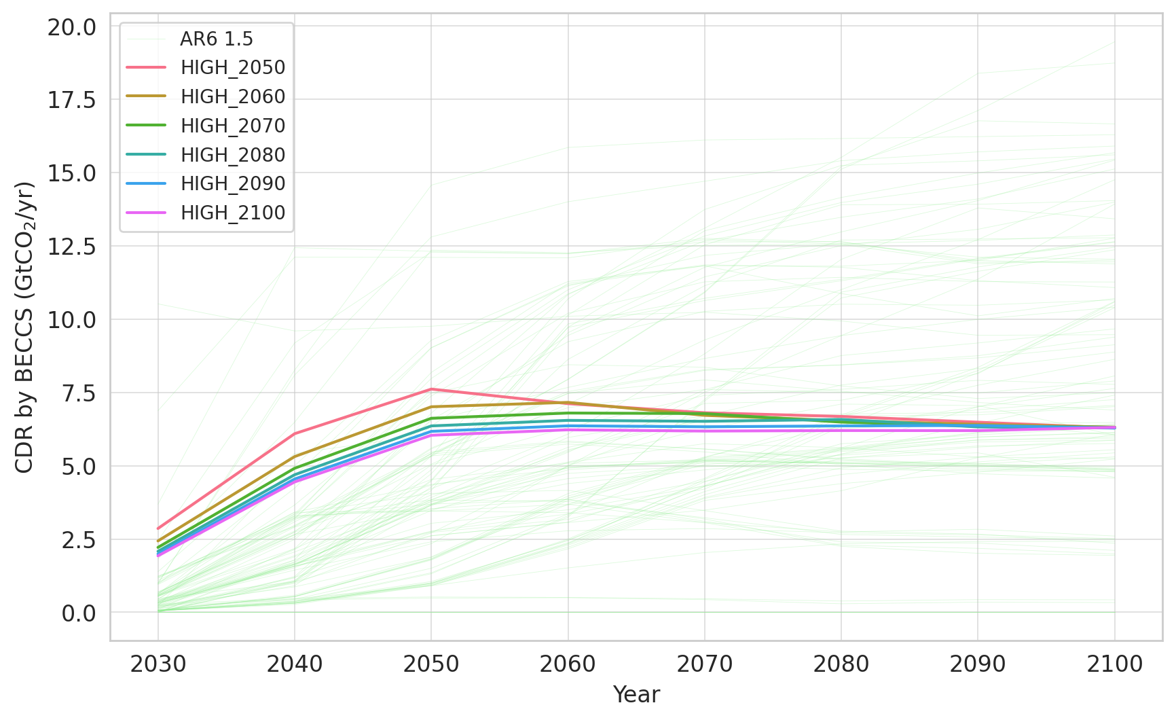
**

Fig. S Total BECCS deployment as a result of Asia’s advanced or delayed climate ambitions under high CDR reliance compared to IPPC 1.5 oCscenarios

**
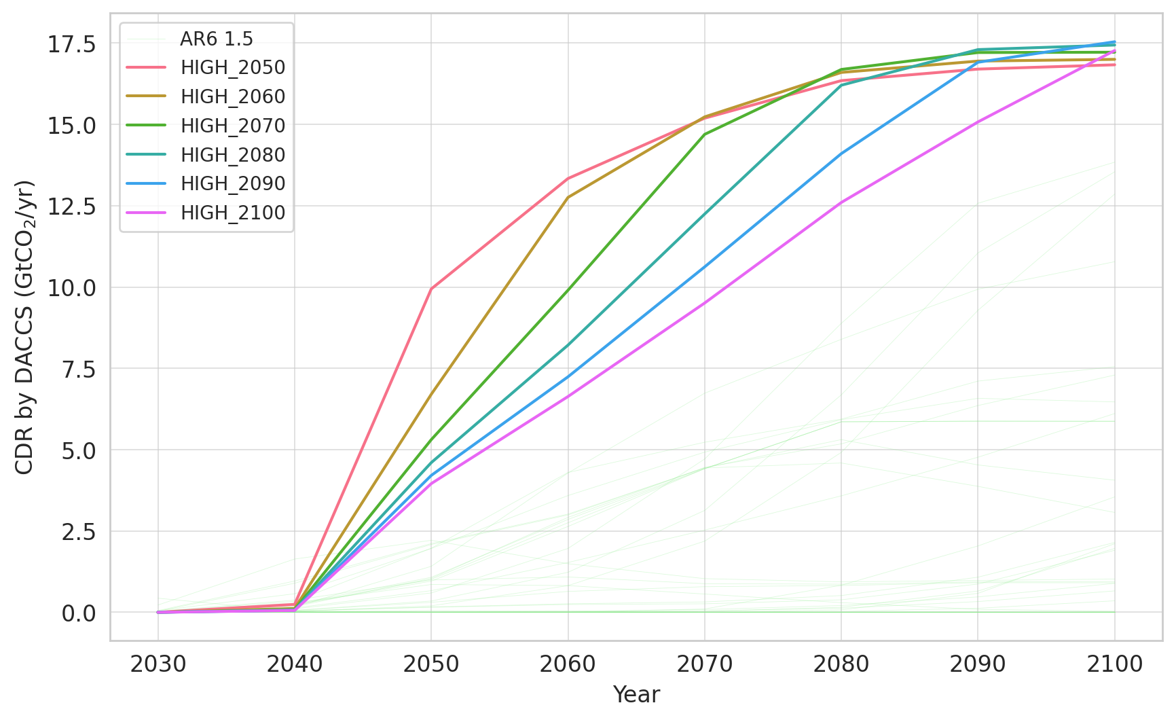
**

Fig. S Total DACCS deployment as a result of Asia’s advanced or delayed climate ambitions under high CDR reliance compared to IPPC 1.5 oCscenarios

## Socio-economics

**
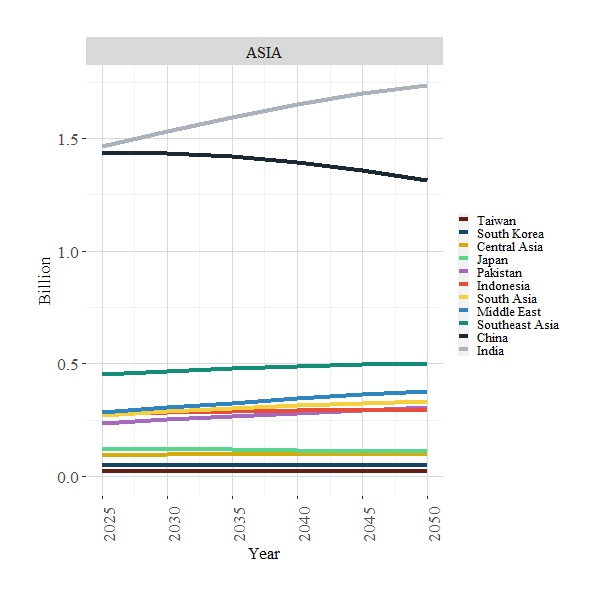
**

Fig. S Population projection by SSP2

**
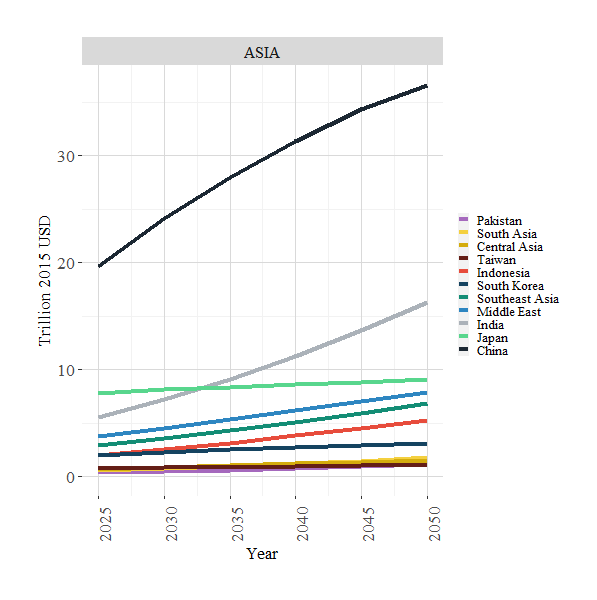
**

Fig. S GDP projection by SSP2

# Detailed discussion of results

## Impact on primary and final energy demand, abatement costs

The phenomenon of intensifying carbon lock-in is a significant risk associated with excessive reliance on CDR, as indicated by the results. Fig. 1a demonstrates that high CDR reliance indeed presents a risk by encouraging continued reliance on fossil fuels, thereby impeding the transition to sustainable energy systems. By attempting to remove large quantities of CO2 from the atmosphere, the remaining carbon budget is extended 2, delaying the necessary transition away from fossil fuels to achieve climate targets. In the REFERENCE scenario, the share of renewables in primary energy consumption in Asia will reach approximately 17% by 2050. Interestingly, the HIGH scenario, which follows a net-zero GHG pathway, achieves similar levels of renewable energy share at 19% by mid-century. Conversely, the shares increase to 30-40% in the MODERATE and LOW scenarios. The share of nuclear power is approximately twice as high in the MODERATE and LOW scenarios compared to the HIGH scenario. A slightly higher capacity of carbon capture and storage (CCS) technologies would be deployed in the HIGH scenario due to its greater reliance on carbon-based energy sources to stay on track for the net-zero goal.

Due to its relatively lower end-use sector electrification, electricity production in the HIGH scenario is relatively lower than the corresponding production under the MODERATE and LOW scenarios (Fig. 1b). By 2050, about 188-193 EJ of electricity would be produced in Asia under the MODERATE and LOW scenarios compared to 160 EJ under the HIGH scenario. Renewable and nuclear-based electricity production is also very significant under the MODERATE and LOW scenarios (170-175 EJ by 2050) compared to 125 EJ under the HIGH scenario. As a consequence, the HIGH scenario exhibits higher fossil-based electricity production.

Also, as shown in Fig. 1c, total refined liquids production is very significant under the HIGH scenario (100 EJ by 2050) compared to 50-53 EJ under the MODERATE and LOW scenarios, and the gap is mainly due to the high reliance on oil under the HIGH scenario. By limiting reliance on CDR, production of biodiesel and cellulosic ethanol could increase. For example, by 2050, about 18-22 EJ of cellulosic ethanol could be produced in Asia under the MODERATE and LOW scenarios compared to 12 EJ under the HIGH scenario. This could be attributed to the affinity towards bioenergy under limited or no availability of negative emissions from novel CDRs in Asia's pathway to net zero.

The observation from electricity and refined liquids production is consistent with that of hydrogen production as shown in Fig. 1d. By 2050, hydrogen production in Asia from electrolysis or thermal splitting could reach nearly 2 EJ under the MODERATE and LOW scenarios, compared to less than 0.5 EJ under the HIGH scenario. Exactly 50% of total hydrogen production by 2050 will be sourced from coal and natural gas under a high CDR reliance compared to less than 20% when the reliance is minimized.

The results are further emphasised spatially in the Asian regions and countries. The findings indicate that the highest-emitting countries, such as China and India, could satisfy their primary energy demands in 2050 with 33% and 45% coming from renewables (wind, hydro, geothermal, solar) under the MODERATE scenario, compared to 17% and 27% under the HIGH scenario, respectively (Fig. 2a). Furthermore, all Asian countries and regions exhibit slightly higher consumption of renewables under the MODERATE scenario compared to the LOW scenario, except for China and India. This is due to their pronounced carbon lock-in systems in comparison to other countries or regions on the continent. The low electrification rate and energy efficiency in the HIGH scenario, compared to its counterparts, are further explored regionally in Fig. 2b (transport) and Fig. 2c (buildings). Fig. 2b illustrates the share of electrified transportation by 2050 under different levels of CDR reliance. Under the HIGH scenario, the highest share of electrified transport in any Asian region or country remains below 15%, with Central Asia and Japan having the highest shares at 12.90% and 8.64%, respectively. Major energy-consuming and emitting countries like China and India only exhibit shares of 4.50% and 3.75% for electrified transport, respectively, due to their highly carbon-intensive transport systems. However, under the MODERATE and LOW scenarios, the highest share of electrified transport can rapidly increase to 42-47%, with China and India's shares reaching about 25-30% and 30-35%, respectively. In all Asian regions, the MODERATE scenario demonstrates a slightly lower share of electrified transport compared to the LOW scenario. The observation is similar to the results in Fig. 2c, which represents the percentage reduction in building energy consumption by 2050 in the net-zero scenarios compared to the REFERENCE scenario. The results in Fig. 2c show that under the HIGH scenario, the highest reduction in building energy consumption would be recorded by Central Asia, South Asia, and China at 25.39%, 22.6%, and 22.50%, respectively. This reduction rate significantly increases to 38.8%, 50%, and 34% in these regions, respectively, under the MODERATE scenario. Opposite to the trend in electrified transport, building energy efficiency standards would be slightly higher under the MODERATE scenario in most Asian regions compared to the LOW scenario.

Fig. 3 illustrates the total final energy consumption by fuel type, and the observations align with those seen in primary energy. Without new climate policies (REFERENCE), total final energy consumption in Asia could reach nearly 350 EJ by 2050. A net-zero GHG ambition in the region would significantly facilitate a transition toward cleaner fuels and energy-efficient measures. However, in the HIGH scenario, the total final energy consumption by 2050 is only 5% lower than the total demand in the REFERENCE scenario, whereas the MODERATE and LOW scenarios show reductions of 35%. While high reliance on negative emissions prolongs the continuous consumption of fossil fuels for final energy needs in the HIGH scenario, energy-efficient practices and technologies are not highly prioritized either.

In the MODERATE scenario, Asia's final energy demands could be met with 162 EJ from electricity and hydrogen, which is 16% higher than the case in the HIGH scenario. While the energy consumption in the transport sector diminishes toward the net-zero year under the MODERATE and LOW scenarios, consumption in the sector continues to increase under the HIGH scenario, following the same pattern as in the absence of new climate policies (REFERENCE). Nearly 30 EJ of electricity and natural gas would be consumed under the HIGH scenario by 2050 solely for removing CO2 from the atmosphere. This can be attributed to the higher reliance on energy-intensive CDR approaches like DACCS for achieving negative emissions 3–5.

On the other hand, the reluctance to transition away from fossil fuel energy systems to sustainable energy alternatives hinges on the relative cost-effectiveness of fossil fuels and their infrastructure compared to their cleaner counterparts 6–8. Relating to Fig. 3b, in the absence of significant negative emissions, other non-CDR mitigation strategies are needed at scale to significantly reduce emissions and lower the need for negative emissions in the first place 9–11. Unfortunately, these strategies are relatively expensive in the near term 12–14 compared to scenarios where cheaper carbon alternatives would continue and later offset all related emissions due to the availability of adequate negative emission solutions. The existing infrastructure is predominantly tailored to fossil fuel energy systems (carbon lock-in) 15–18, making the transition to renewable sources more challenging and expensive due to necessary overhauls and new installations. Furthermore, fossil fuel industries benefit from established economies of scale 19, which clean energy solutions are still developing. Results in Fig. 3b show the optimal marginal abatement cost of carbon required by each scenario to reach climate goals. The marginal abatement cost of carbon is the cost required to reduce the last unit of emissions to reach a climate target, and this cost is zero for scenarios with no plans for new climate policies 9. The results reveal a significant gap in how much is required to reduce one ton of CO2 from the atmosphere in each net-zero pathway, with the HIGH scenario showing just over $300/tCO2 by 2050, compared to over $2500/tCO2 and $3300/tCO2 in the MODERATE and LOW scenarios, respectively. Qiu et al. recently showed that the availability of negative emissions in the US electricity system presents economic advantage in mitigating the last few percent of CO2 from the sector 12. As the production and adoption of renewable energy increase, the costs are likely to decrease due to improved efficiency and technological advancements. Already, renewables and other clean energy solutions are increasingly becoming more affordable A recent report by IRENA illustrates that nearly 66% of the renewable energy capacities installed in 2021 were more cost-efficient than the most economical coal-powered alternatives in G20 nations. The expenses associated with electricity from onshore wind experienced a reduction of 15%, while those from offshore wind and solar photovoltaics (PV) decreased by 13% each in comparison to 2020 20. With continuous developments, learning curves, and economies of scale, alongside proper policy schemes, the marginal cost gap, as seen in the results, could be bridged. The results here emphasize that abatement cost is a major co-benefit that comes with high CDR reliance.

## Impact on positive and negative emissions, net zero timing, pollutants

Results in Fig. 4a, which show positive GHG emissions by sector and species, indicate that Asia's total GHG emissions would continue to grow under the REFERENCE scenario, reaching about 40 GtCO2e by 2050, approximately 80% of today's global GHG emissions. Significant reductions in emissions are expected under the net-zero pathways, and a net-zero GHG ambition by 2050 in Asia could reduce the region's total GHG emissions to less than 20 GtCO2e by mid-century.

Economically speaking, undue substitution is a typical characteristic of CDR systems, allowing for continued fossil emissions through carbon offsetting 21,22. As a result, while total positive GHG emissions under the HIGH scenario reach 16 GtCO2e by 2050, those in the MODERATE and LOW scenarios reach 11 and 13 GtCO2e, respectively. Methane emissions would continue to decline in the MODERATE and LOW scenarios, reaching 2.5 GtCO2e and 2.4 GtCO2e, respectively, by 2050, while in the HIGH scenario, they increase throughout the period, reaching 3.3 GtCO2e by mid-century.

In terms of sectoral emissions, the most significant reductions in emissions in a low to moderate CDR reliant-environment (LOW and MODERATE) compared to a highly reliant-environment (HIGH) would be observed in the building and transport sectors. Transport sector emissions under the HIGH scenarios increase by 15% between 2025-2050, while emissions from buildings reduce by nearly 25% during the same period. In comparison, due to its higher affinity for electricity, hydrogen, and energy efficient approaches, transport and building sector emissions reduce by 85% and 90%, respectively, in the MODERATE scenario during the same period.

Total gross CO2 removal by CDR approaches is represented in Fig. 4b. It should be noted that the results only capture CDR approaches, so the CO2 removal by bioenergy crops for their growth via photosynthesis is not included. Total gross CO2 removal under the HIGH scenario would quickly scale to approximately 12 GtCO2 by 2050, compared to 2.3 GtCO2 and 0.5 GtCO2 in the MODERATE and LOW scenarios, respectively. Under the HIGH scenario, BECCS (4.6 GtCO2), DACCS (4.2 GtCO2), and ERW (2.2 GtCO2) would play the most important roles, collectively reaching 11 GtCO2 of removal potential by 2050. DORCS would play the least role, with deployment of under 2 MtCO2 by 2050 in Asia. This could be attributed to high system cost and operation of DORCS (which is dominated by systems coupled with desalination plants). In these systems, desalination and CO2 removal both share the cost and energy required for a successful operation of the plant. DORCS technology without such configurations (stand-alone) is relatively very expensive to deploy 23. As such, the deployment of DORCS (co-located with desalination plants) is limited by the demand for desalinated water, and regions like the Middle East with high demands for desalinated water benefit the most from this limitation. About 16 km3 of desalinated water is required by the Middle East in 2050, and 40% of this demand would be met by DORCS (co-located with desalination plants). In perspective, the next region or country on the continent with the highest demand for desalinated water is Central Asia at 3.6 km3 by 2050. Hence, about 70% of the total DORCS deployment for negative emissions in Asia by 2050 would be located in the Middle East alone.

As shown in Fig. 4b, the presence of multiple CDR approaches in the HIGH scenario reduces the overall role of net negative emissions from land use change (LUC). Despite having significantly lower total gross CO2 removal, about 452 MtCO2 of net negative emissions could be sourced from LUC under the MODERATE scenario, compared to 437 MtCO2 in the HIGH scenario. The availability of multiple CDR approaches displaces some conventional sources of negative emissions, such as afforestation and reforestation, which reduces net negative emissions from LUC.

In the absence of new climate policies, Asia's total air pollutants, including black carbon (BC), ammonia (NH3), non-methane volatile organic compounds (NMVOCs), nitrogen oxides (NOx), organic compounds (OC), and sulfur dioxide (SO2), would decline from 237 Tg to 213 Tg between 2025-2050, with all pollutants decreasing during the 25-year period except NH3 (Fig. 4c). Between 2025-2050, all air pollutants reduce in quantity in the net-zero pathways except NH3 under the MODERATE and LOW scenario, which show about a 14-16% growth between the two periods. Due to its high reliance on carbon-based energy sources, fuels, and inefficient practices, total air pollutants in the HIGH scenario reach 140 Tg by 2050, compared to 107 Tg and 103 Tg in the MODERATE and LOW scenarios, respectively. As seen in Fig. 4c, for all scenarios, the major contributor to total air pollutants is NMVOCs, except under the MODERATE and LOW scenarios – where NH3 becomes the largest contributor between 2045-2050. During the pathway to net-zero emissions by 2050 in Asia, the highest emission reduction potential for any type of pollutant would be recorded in BC (> 75% between 2025-2050) under MODERATE and LOW followed by OC (68-75%). BC and OC emissions often result from incomplete combustion processes, such as those in diesel engines and solid fuel burning 24,25. The significant reduction in fossil fuel consumption in the MODERATE and LOW scenarios could lead to a substantial reduction in BC and OC emissions. The high reliance on fossil and solid fuels in the HIGH scenarios leads to lower BC and OC reduction potential. The LOW and MODERATE scenarios also show a reduction of 55%-57%, 63-65%, 58-62% of NMVOC, NOx, and SO2, respectively from 2025 to 2050. In comparison, only 24%, 28%, and 37% of reduction of these air pollutants are achieved under the HIGH scenario during the same period.

Fig. 5a represents how total positive CO2 emissions in Asia by 2050 are distributed among the countries and regions. The results here provide more insights that could help us understand how total negative CO2 emissions would be fairly distributed within the continent to offset emissions. The results show that under the HIGH scenario, the following countries' (or regions') CO2 emissions would exceed 1 GtCO2 by mid-century: China (4.1 GtCO2), India (2.4 GtCO2), the Middle East (1.2 GtCO2), and Southeast Asia (1.2 GtCO2).

The same four countries or regions individually cross the 1 GtCO2 threshold by 2050 under the LOW scenario; that is, China (2.3 GtCO2), India (1.7 GtCO2), the Middle East (1.4 GtCO2), and Southeast Asia (1.0 GtCO2). Interestingly, among all countries and regions, only the Middle East and South Asia would record higher total positive CO2 emissions by 2050 under the LOW scenario compared to their respective values under the HIGH scenario. This indicates the difficulty in significantly reducing emissions in those regions without the deployment of novel CDR technologies. For all countries and regions, the total positive CO2 emissions would be lowest under the MODERATE scenario compared to their respective outputs in the HIGH and LOW scenarios. Under the MODERATE scenario, only China's (2.2 GtCO2) and India's (1.4 GtCO2) total positive emissions exceed 1 GtCO2 by 2050.

The results here indicate that the largest share of CO2 removal in Asia would be concentrated within China, India, the Middle East, and Southeast Asia to offset their relatively higher gross positive emissions compared to the other countries or regions on the continent.

The distribution of total gross CDR by 2050 among Asian countries and regions is shown in Fig. 5b. Under the HIGH scenario, CO2 removal by mid-century would be mainly concentrated in China (6 GtCO2), India (1.8 GtCO2), and the Middle East (0.9 GtCO2). Under the MODERATE scenarios, these removal capacities in the three countries/regions significantly reduce to 1.2, 0.5, and 0.08 GtCO2, respectively, which could be attributed to the significant reduction in gross positive emissions as seen in Fig. 5a.

It is interesting to note that under the LOW scenario, regions or countries like India, Japan, Pakistan, and South Korea show 'negative' values – indicating higher net positive land use emissions by these regions (i.e., deforestation exceeds afforestation in these regions by 2050 in the absence of novel CDR)

Since the current modeled emission pathway follows a net-zero GHG target, Asia would achieve net-zero CO2 emissions earlier, before mid-century. It is worth noting that due to the relatively low deployment of negative emissions in the LOW scenario, Asia would reach net-zero CO2 emissions before 2050, at least 5 years later than in the case of the HIGH and MODERATE scenarios (in both cases, Asia reaches net-zero CO2 emissions before 2045).

An interesting observation can also be seen in Fig. 5c, which represents the year when each Asian country/region achieves net-zero CO2 emissions (irrespective of them collectively reaching net-zero GHG emissions by 2050, as the modeled pathway stipulates). Under the HIGH scenario, Southeast Asia would attain net-zero CO2 emissions the earliest, before 2040, while countries like Central Asia, China, India, and South Asia achieve theirs before 2045, followed by Japan before 2050. The rest of the countries or regions (Indonesia, the Middle East, Pakistan, South Korea, and Taiwan) rather pursue cheaper decarbonization routes by purchasing foreign CDR instead of achieving net zero before the end of 2050, which is relatively more expensive.

However, under the MODERATE and LOW scenarios, Asian countries or regions could advance or maintain the year of attaining net-zero CO2 emissions compared to the case of the HIGH scenario. Interestingly, it becomes relatively cheaper to pursue net zero before the end of 2050 under the MODERATE and LOW scenarios than to purchase foreign CDR. Hence, all countries/regions would achieve net-zero CO2 before 2050 under the MODERATE and LOW scenarios. The results here indicate that by minimizing the reliance on CDR, countries' or regions' significant adoption of deep decarbonization measures outside negative emission solutions makes the pathway to net-zero faster and easier from a technical perspective.

## Impact on land, water, fertilizer consumption

Ambitious climate pledges like net-zero GHG emissions by 2050 would bring significant land use changes in Asia due to the increase in demand for energy and negative emissions, as seen in Fig. 6a. In the REFERENCE scenario, by 2050, about 5.8 million square kilometers of Asian land would be dedicated to energy and negative emissions in the form of bioenergy crops and forest cover. This compares to 9.4 million square kilometers in the HIGH scenario (which includes cropland allocation to biochar), 6.4 million square kilometers each in the MODERATE and LOW scenarios. On an annual average, between 2025-2050, about 0.3 million square kilometers of land would be dedicated to cultivating bioenergy crops annually in the HIGH scenario, compared to 0.6 million square kilometers each under the MODERATE and LOW scenarios. This could be attributed to the increasing need for low-carbon energy sources (including bioenergy) in the absence of adequate negative emissions from novel CDR deployment in these scenarios for achieving climate goals.

The lack of any other novel CDR beyond BECCS in the MODERATE scenario or any novel CDR as in the case of the LOW scenario safeguards cropland, which includes land for food and non-food crops. In the MODERATE scenario, land allocation in Asia to crops by 2050 stands at 4.1 million square kilometers compared to 1.3 million square kilometers in the HIGH scenario. This could be attributed to the presence of biochar as a CDR approach in the HIGH scenario. That is, by 2050, about 3.4 million square kilometers of biomass and crops would be allocated to biochar in the HIGH scenario, and this could potentially affect food security in the region compared to the case in the MODERATE scenario. In essence, cropland reduces by over 50% between 2025-2050 under the HIGH scenario compared to under 10% in the MODERATE scenario.

The absence of biochar for negative emissions would basically limit land use competition, and land use types such as grass, pasture, and shrubs have higher allocations in scenarios where the CDR reliance is MODERATE or LOW compared to the HIGH scenario.

There are potential trade-offs concerning water consumption associated with different levels of CDR reliance. As seen in Fig. 6b, high CDR reliance could risk increasing water demands in sectors or for activities such as bioelectricity CCS, bioenergy crop cultivation, CO2 removal, industry, meat and dairy, municipal water, and non-food crop cultivation. Due to the deployment of 4.6 GtCO2 of BECCS by mid-century under the HIGH scenario compared to 1.9 GtCO2 in the MODERATE scenario, about 3.6 km3 of water is consumed for bioelectricity CCS by 2050 under the HIGH scenario compared to 1.7 km3 under the MODERATE scenario. Results from the previous sections show an increased affinity for electricity consumption in final energy under the MODERATE and LOW scenarios. As such, water consumption for electricity generation would reach 76-80 km3 under the MODERATE and LOW scenarios by 2050 compared to 64 km3 under the HIGH scenario (Fig. 6b). Furthermore, despite having a relatively higher land allocation to bioenergy crop cultivation, the water consumption for growing bioenergy crops remains lower under the MODERATE and LOW scenarios compared to that under the HIGH scenario. This could be attributed to the nature of crops grown purposefully for bioenergy in the three scenarios. The results indicate that the bioenergy crops under the HIGH scenario have a significantly higher biophysical water footprint and also possess additional requirements for artificial irrigation beyond what is required for bioenergy crops under the MODERATE and LOW scenarios.

By 2050, about 15 km3 of water would be consumed by DACCS for removing CO2 from the atmosphere under the HIGH scenario, which is completely avoided in the MODERATE and LOW scenarios. Also, due to the higher land allocation for food crops under the MODERATE scenario, the water consumption for cultivating food crops by 2050 would be 5% higher than that consumed under the HIGH scenario. On the other hand, the heavy industrial processes coupled with high fossil fuel consumption and inefficient practices under the HIGH scenario would cause a 13% higher water consumption in the industry sector by 2050 compared to that consumed under the MODERATE scenario.

Overall, the net-zero pathways show increased water consumption (about 1300 km3 by 2050) compared to the case where no new climate policies are formulated (about 1200 km3). Total water consumption during the pathway to net zero in Asia would be at its lowest when CDR reliance is very minimal before mid-century. Minimizing the reliance on negative emissions has the tendency to cause a slight increase in total water consumption due to the increased water demands in sectors or purposes such as electricity generation and food crop cultivation.

Climate ambitions would increase fertilizer demand 26 primarily due to the increased requirement for bioenergy as shown in Fig. 6c. In the REFERENCE scenario, the requirement for nitrogen fertilizer is almost the same as that required in the net-zero pathways, at approximately 85 MtN by 2050. However, under the REFERENCE scenario, only 2 MtN of nitrogen fertilizer would be required for cultivating bioenergy crops by 2050, compared to about 7 MtN in the net-zero pathways. The demand for nitrogen fertilizer across different levels of CDR reliance is similar to the observation made in the results of water consumption. The HIGH scenario would lead to a slightly higher fertilizer demand for bioenergy crop cultivation (7 MtN by 2050) compared to 6.6 MtN and 6.8 MtN in the MODERATE and LOW scenarios, respectively.

In the absence of additional sources of negative emissions beyond BECCS and AR, bioenergy consumption increases. This is reflected in Fig. 7a, which illustrates the percentage change in land allocation to bioenergy crops between 2025 and 2050. The results in Fig. 7a indicate that all Asian countries or regions would experience a significant increase in land allocation to bioenergy crops under the MODERATE and LOW scenarios compared to the HIGH scenario. South Korea exhibits the highest growth at 3478% under the LOW scenario, in contrast to 956% under the HIGH scenario. Pakistan, China, South Asia, and the Middle East also show substantial growth rates under the LOW scenario, at 1396%, 1185%, 1068%, and 1145%, respectively, compared to 426%, 423%, 353%, and 376% under the HIGH scenario.

Fig. 7b also depicts the percentage of loss in land allocated to crops between 2025 and 2050. As mentioned earlier, the presence of biochar for CO2 removal at any time during the century (before and/or after mid-century) has significant implications on cropland and negatively affects food security. Under the HIGH scenario, the most affected regions or countries in terms of cropland reduction would be Taiwan (-100%), Indonesia (-80%), Pakistan (-78%), Southeast Asia (-76%), South Asia (-75%), and India (-67%). The rest of the regions experience less than a 50% loss in cropland during the period. Under the MODERATE and LOW scenarios, the impact is significantly less severe, with Taiwan (-84 to -85%), Indonesia (-2 to -4%), Pakistan (-6%), Southeast Asia (-3 to -4 %), South Asia (-7 to -8%), and India (-5 to -6%). Interestingly, South Korea and Japan record positive gains in land allocation to crops under the MODERATE and LOW scenarios.

## Global implications as a result of high reliance on CDR (Effect of early or delayed climate ambitions from Asia)

The global fight against climate change hinges on our collective commitment to reduce greenhouse gas (GHG) emissions. The overarching objective is to achieve net zero emissions, where the amount of GHGs, primarily CO2 emitted is equivalent to the amount removed from the atmosphere. While many regions are setting ambitious targets to achieve this by 2050, the trajectory of Asia, a significant contributor to global emissions, plays a pivotal role in the overall outcome. By being the most carbon lock-in region in the world, we anticipate that Asia would be the region to face the most difficulty in transitioning to global net zero-consistent pathway. In the provided scenarios, while the rest of the world is assumed to achieve net zero GHG emissions by 2050, Asia's trajectory varies. Depending on the scenario, Asia's net zero target ranges from 2050 to 2100. This variability could have profound implications for global climate-energy-land-water systems.

For instance, in the "HIGH_2050" scenario, where both Asia and the rest of the world target 2050 for net zero emissions, the annual average gross positive CO2 emissions from 2025 to 2050 is 23.95 GtCO2/yr. However, every delay of a decade in Asia's commitment results in an uptick in this average. By the "HIGH_2100" scenario, where Asia's target is postponed to 2100, the annual average rises to 27.36 GtCO2/yr (Fig. 8a). This means that for every year Asia delays its net zero target beyond 2050, the world sees an additional 0.0683 GtCO2/yr in emissions, relative to the baseline scenario.

The requirement for CDR is directly influenced by the amount of GHG emissions produced. As one of the significant contributors to global emissions, Asia's timeline for achieving net zero emissions plays a pivotal role in determining the CDR needs. As seen in Fig. 8b, in a scenario where both Asia and the rest of the world achieve net zero GHG emissions by 2050, the annual average CDR requirement from 2025 to 2050 stands at 11.64 GtCO2/yr. However, every subsequent delay in Asia's commitment results in a reduced CDR requirement. By the time Asia's commitment is postponed to 2100, the annual average CDR requirement diminishes to 7.99 GtCO2/yr. This reduction might appear as a silver lining, suggesting less intervention is needed. However, it paints a concerning picture – a reduced CDR requirement implies a higher residual emission that will not be offset, thus, exacerbating global warming and its associated challenges.

As the world strives to solve climate change, the percentage of renewables and nuclear in primary energy consumption is a critical mitigation action. However, regional commitments, especially those of significant contributors like Asia, can significantly influence this global percentage. In a scenario where both Asia and the rest of the world pursue net zero GHG emissions by 2050, renewables and nuclear account for an annual average of 38.99%/yr of primary energy consumption between 2025 and 2050. Yet, every delay in Asia's commitment results in a decline in this share. This share shrinks to 35.66%/yr when Asia’s commitment is delayed to the end-of century, as seen in Fig. 8c.

As seen in Fig. 8d, as Asia delays its net zero commitment, the peak warming levels consistently increase. This is a direct consequence of rising CO2 emissions. With every decade of delay in Asia's commitment, the CO2 emissions increase, adding more heat-trapping gases to the atmosphere and intensifying global warming. The end-of-century temperatures offer a more alarming insight. Under the condition that the rest of the world achieve net zero GHG emissions before 2050, Asia can afford to delay its commitments up to 2080 and the world will still remain within the Paris Agreement's 1.5 °C limit. However, any delay beyond 2080 pushes the end-of-century temperature change above the 1.5 °C mark. This observation is partly linked to these consequences from a delayed net zero ambition from Asia: higher gross positive CO2 emissions, reduced requirement for CDR, higher residual emissions from hard-to-abate and agricultural sectors, and the declining share of renewables and nuclear in primary energy consumption. A delayed commitment from Asia means a prolonged reliance on fossil fuels, reduced adoption of clean energy technologies, and less focus on mitigating interventions like CDR. All these factors culminate in higher end-of-century temperatures.

# Model parameterization and underlying equations for demand and supply

In this section, some underlying parameters/modelling assumptions and selected equations. Unless cited otherwise, all information are obtained from Ref. 27, and additional information not discussed or presented here can be obtained from the same source.

Table S Fraction of CO2 captured by transformation technologies

| Supply sector | Subsector | Technology | 1971 | 2100 |
| --- | --- | --- | --- | --- |
| Refining | Coal to liquids | Coal to liquids ccs level 1 | 0.818 | 0.818 |
| Refining | Coal to liquids | Coal to liquids ccs level 2 | 0.9 | 0.9 |
| Refining | Biomass liquids | Cellulosic ethanol ccs level 1 | 0.26 | 0.26 |
| Refining | Biomass liquids | Cellulosic ethanol ccs level 2 | 0.9 | 0.9 |
| Refining | Biomass liquids | Ft biofuels ccs level 1 | 0.818 | 0.818 |
| Refining | Biomass liquids | Ft biofuels ccs level 2 | 0.9 | 0.9 |

Table S Primary energy transformation technologies default cost assumptions (1975$/GJ)

| Supply sector | Technology | 1971 | 2010 | 2100 | Improvement max | Improvement rate |
| --- | --- | --- | --- | --- | --- | --- |
| Gas processing | Natural gas | 0.2 | 0.2 | 0.2 |  |  |
| Gas processing | Biomass gasification | 7.030087 | 7.030087 |  | 0.7 | 0.03 |
| Gas processing | Coal gasification | 5.285779 | 5.285779 |  | 0.7 | 0.03 |
| Nuclear fuel gen II | Enriched uranium | 0.124464 | 0.124464 | 0.124464 |  |  |
| Nuclear fuel gen III | Enriched uranium | 0.124464 | 0.124464 | 0.124464 |  |  |
| Refining | Oil refining | 0.84 | 0.84 | 0.84 |  |  |
| Refining | Coal to liquids | 5.294118 | 5.294118 |  | 0.7 | 0.03 |
| Refining | Coal to liquids ccs level 1 | 5.980615 | 5.980615 |  | 0.6 | 0.05 |
| Refining | Coal to liquids ccs level 2 | 6.467671 | 6.467671 |  | 0.6 | 0.05 |
| Refining | Gas to liquids | 3.970588 | 3.970588 |  | 0.7 | 0.03 |
| Refining | Cellulosic ethanol | 4.74 | 4.74 |  | 0.7 | 0.03 |
| Refining | Cellulosic ethanol ccs level 1 | 4.991818 | 4.991818 |  | 0.6 | 0.05 |
| Refining | Cellulosic ethanol ccs level 2 | 6.850562 | 6.850562 |  | 0.6 | 0.05 |
| Refining | Ft biofuels | 7.802308 | 7.802308 |  | 0.7 | 0.03 |
| Refining | Ft biofuels ccs level 1 | 8.516923 | 8.516923 |  | 0.6 | 0.05 |
| Refining | Ft biofuels ccs level 2 | 8.97527 | 8.97527 |  | 0.6 | 0.05 |
| Refining | Corn ethanol | 2.38 | 2.38 | 2.38 |  |  |
| Refining | Sugar cane ethanol | 2 | 2 | 2 |  |  |
| Refining | Biodiesel | 1.88 | 1.88 | 1.88 |  |  |

Table S Electricity technology capacity factors

| Supply sector | Subsector | Technology | 1971 | 2100 |
| --- | --- | --- | --- | --- |
| Electricity | Coal | Coal (Conventional Pulverized Coal | 0.85 | 0.85 |
| Electricity | Coal | Coal (Conventional Pulverized Coal with CCS) | 0.8 | 0.8 |
| Electricity | Coal | Coal (Integrated Gasification Combined Cycle) | 0.8 | 0.8 |
| Electricity | Coal | Coal (Integrated Gasification Combined Cycle with CCS) | 0.8 | 0.8 |
| Electricity | Gas | Gas (Steam Cycle/Turbine) | 0.8 | 0.8 |
| Electricity | Gas | Gas (Combined Cycle) | 0.85 | 0.85 |
| Electricity | Gas | Gas (Combined Cycle with CCS) | 0.8 | 0.8 |
| Electricity | Refined liquids | Refined liquids (Steam Cycle/Turbine) | 0.8 | 0.8 |
| Electricity | Refined liquids | Refined liquids (Combined Cycle) | 0.85 | 0.85 |
| Electricity | Refined liquids | Refined liquids (Combined Cycle with CCS) | 0.8 | 0.8 |
| Electricity | Biomass | Biomass (conventional) | 0.85 | 0.85 |
| Electricity | Biomass | Biomass (conventional with CCS) | 0.85 | 0.85 |
| Electricity | Biomass | Biomass ((Integrated Gasification Combined Cycle) | 0.8 | 0.8 |
| Electricity | Biomass | Biomass ((Integrated Gasification Combined Cycle with CCS) | 0.8 | 0.8 |
| Electricity | Nuclear | Generation II Light Water Reactor | 0.9 | 0.9 |
| Electricity | Nuclear | Generation III | 0.9 | 0.9 |
| Electricity | Wind | Wind | 0.37 | 0.37 |
| Electricity | Wind | Wind with storage | 0.37 | 0.37 |
| Electricity | Solar | Photovoltaic (PV) | 0.2 | 0.2 |
| Electricity | Solar | PV with storage | 0.2 | 0.2 |
| Electricity | Solar | Concentrated solar power (CSP) | 0.25 | 0.25 |
| Electricity | Solar | CSP with storage | 0.5 | 0.5 |
| Electricity | Geothermal | Geothermal | 0.9 | 0.9 |
| Electricity | Rooftop PV | Rooftop PV | 0.17 | 0.17 |

Table S Electricity technology capture fractions (portion of CO2 emissions that are captured)

| Supply sector | Subsector | Technology | 1971 | 2020 | 2100 |
| --- | --- | --- | --- | --- | --- |
| Electricity | Coal | Coal (Conventional Pulverized Coal with CCS) | 0.85 | 0.85 | 0.95 |
| Electricity | Coal | Coal (Integrated Gasification Combined Cycle with CCS) | 0.85 | 0.85 | 0.95 |
| Electricity | Gas | Gas (Combined Cycle with CCS) | 0.85 | 0.85 | 0.95 |
| Electricity | Refined liquids | Refined liquids (Combined Cycle with CCS) | 0.85 | 0.85 | 0.95 |
| Electricity | Biomass | Biomass (conventional with CCS) | 0.85 | 0.85 | 0.95 |
| Electricity | Biomass | Biomass ((Integrated Gasification Combined Cycle with CCS) | 0.85 | 0.85 | 0.95 |

Table S Electricity technology retirement parameters

| Subsector | Technology | Year | Lifetime | Half life | Steepness |
| --- | --- | --- | --- | --- | --- |
| Coal | Coal (Conventional Pulverized Coal) | Final-calibration-year | 60 | 30 | 0.1 |
| Gas | Gas (Steam Cycle/Turbine) | Final-calibration-year | 45 | 22.5 | 0.1 |
| Gas | Gas (Combined Cycle) | Final-calibration-year | 45 | 22.5 | 0.1 |
| Refined liquids | Refined liquids (Steam Cycle/Turbine) | Final-calibration-year | 45 | 22.5 | 0.1 |
| Biomass | Biomass (conventional) | Final-calibration-year | 60 | 30 | 0.1 |
| Nuclear | Generation II Light Water Reactor | Final-historical-year | 60 | 30 | 0.1 |
| Wind | Wind | Final-calibration-year | 30 |  |  |
| Solar | PV | Final-calibration-year | 30 |  |  |
| Solar | CSP | Final-calibration-year | 30 |  |  |
| Geothermal | Geothermal | Final-calibration-year | 30 |  |  |
| Coal | Coal (Conventional Pulverized Coal) | Initial-future-year | 60 |  |  |
| Coal | Coal (Integrated Gasification Combined Cycle) | Initial-future-year | 60 |  |  |
| Coal | Coal (Integrated Gasification Combined Cycle with Carbon Capture and Storage) | Initial-future-year | 60 |  |  |
| Gas | Gas (Combined Cycle with Carbon Capture and Storage) | Initial-future-year | 45 |  |  |
| Refined liquids | Refined liquids (Combined Cycle) | Initial-future-year | 45 |  |  |
| Refined liquids | Refined liquids (Combined Cycle with Carbon Capture and Storage) | Initial-future-year | 45 |  |  |
| Biomass | Biomass (conventional with CCS) | Initial-future-year | 60 |  |  |
| Biomass | Biomass (Integrated Gasification Combined Cycle) | Initial-future-year | 60 |  |  |
| Biomass | Biomass (Integrated Gasification Combined Cycle with Carbon Capture and Storage) | Initial-future-year | 60 |  |  |
| Nuclear | Generation III | Initial-nonhistorical-year | 60 |  |  |
| Wind | Wind with storage | Initial-future-year | 30 |  |  |
| Solar | PV with storage | Initial-future-year | 30 |  |  |
| Solar | CSP with storage | Initial-future-year | 30 |  |  |
| Wind | Wind offshore | Final-calibration-year | 25 |  |  |
| Wind | Wind offshore | Initial-future-year | 25 |  |  |

Note: lifetime: maximum lifetime of cohort. If no retirement function is used; the entire cohort is retired in this number of years. half life: number of years at which 50% of the cohort is retired; using the s-curve-shutdown-decider retirement function. steepness: shape parameter used by the s-curve-shutdown-decider retirement function.

Table S Industrial energy use default efficiencies

| Technology | Energy input | Secondary output | 1971 | 2020 | 2050 | 2080 | 2100 |
| --- | --- | --- | --- | --- | --- | --- | --- |
| Biomass | Delivered biomass | | 0.746423 | 0.797 | 0.81 | 0.823 | 0.828 |
| Biomass cogeneration | Delivered biomass | Electricity | 0.515677 | 0.56 | 0.577 | 0.595 | 0.604 |
| Coal | Delivered coal | | 0.80808 | 0.891 | 0.909 | 0.926 | 0.936 |
| Coal cogeneration | Delivered coal | Electricity | 0.582005 | 0.629 | 0.644 | 0.661 | 0.67 |
| District heat | District heat | | 1 | 1 | 1 | 1 | 1 |
| Electricity | Electricity (industry) | | 0.934197 | 1.015 | 1.046 | 1.078 | 1.094 |
| Gas | Wholesale gas | | 0.82583 | 0.898 | 0.926 | 0.955 | 0.969 |
| Gas cogeneration | Wholesale gas | Electricity | 0.563321 | 0.612 | 0.63 | 0.649 | 0.659 |
| Hydrogen | Hydrogen enduse | | 1 | 1 | 1.03 | 1.062 | 1.078 |
| Hydrogen cogeneration | Hydrogen enduse | Electricity | 0.457 | 0.457 | 0.471 | 0.485 | 0.492 |
| Refined liquids | Refined liquids industrial | | 0.917381 | 1.001 | 1.033 | 1.062 | 1.077 |
| Refined liquids cogeneration | Refined liquids industrial | Electricity | 0.565189 | 0.614 | 0.632 | 0.652 | 0.662 |
| Coal | Delivered coal | | 1 | 1 | 1 | 1 | 1 |
| Gas | Wholesale gas | | 1 | 1 | 1 | 1 | 1 |
| Refined liquids | Refined liquids industrial | | 1 | 1 | 1 | 1 | 1 |

Table S Carbon storage resource supply curve points (2005$/tCO2)

| Resource | Subresource | Grade | Fraction | Cost |
| --- | --- | --- | --- | --- |
| Onshore carbon-storage | Onshore carbon-storage | Grade 1 | 0 | 0 |
| Onshore carbon-storage | Onshore carbon-storage | Grade 2 | 0.005 | 0.1 |
| Onshore carbon-storage | Onshore carbon-storage | Grade 3 | 0.1 | 5 |
| Onshore carbon-storage | Onshore carbon-storage | Grade 4 | 0.6 | 10 |
| Onshore carbon-storage | Onshore carbon-storage | Grade 5 | 0.295 | 75 |
| Onshore carbon-storage | Onshore carbon-storage | Grade 6 | 0 | 3500 |

Table S Calibration values for the CO2 removal sector (MtC)

| GCAM region | sector | year | value |
| --- | --- | --- | --- |
| USA | CO2 removal | 2015 | 2000 |
| Africa Eastern | CO2 removal | 2015 | 26.58922 |
| Africa Northern | CO2 removal | 2015 | 26.30296 |
| Africa Southern | CO2 removal | 2015 | 25.52156 |
| Africa Western | CO2 removal | 2015 | 51.65929 |
| Australia (with New Zealand) | CO2 removal | 2015 | 417.4775 |
| Brazil | CO2 removal | 2015 | 1012.358 |
| Canada | CO2 removal | 2015 | 79.87708 |
| Central America and Caribbean | CO2 removal | 2015 | 86.18576 |
| Central Asia | CO2 removal | 2015 | 429.8247 |
| China | CO2 removal | 2015 | 2116.542 |
| EU-12 | CO2 removal | 2015 | 22.06217 |
| EU-15 | CO2 removal | 2015 | 71.77459 |
| Europe (Eastern) | CO2 removal | 2015 | 15.81593 |
| Europe (Non EU) | CO2 removal | 2015 | 15.84964 |
| European Free Trade Association | CO2 removal | 2015 | 6.34295 |
| India | CO2 removal | 2015 | 87.41423 |
| Indonesia | CO2 removal | 2015 | 16.37849 |
| Japan | CO2 removal | 2015 | 66.31417 |
| Mexico | CO2 removal | 2015 | 232.7633 |
| Middle East | CO2 removal | 2015 | 334.5848 |
| Pakistan | CO2 removal | 2015 | 7.458686 |
| Russia | CO2 removal | 2015 | 313.093 |
| South Africa | CO2 removal | 2015 | 5.567627 |
| South America (Northern) | CO2 removal | 2015 | 161.9685 |
| South America (Southern) | CO2 removal | 2015 | 470.9671 |
| South Asia | CO2 removal | 2015 | 8.830837 |
| South Korea | CO2 removal | 2015 | 0 |
| Southeast Asia | CO2 removal | 2015 | 165.692 |
| Taiwan | CO2 removal | 2015 | 0.307808 |
| Argentina | CO2 removal | 2015 | 331.3725 |
| Colombia | CO2 removal | 2015 | 136.5132 |

Table S CO2 capture rates for DAC and process heat DAC technology

| Supply sector | Subsector | Technology | 1971 | 2100 |
| --- | --- | --- | --- | --- |
| Process heat DAC | Gas ccs | Gas ccs | 0.95 | 0.95 |
| CO2 removal | DAC | High temperature DAC (natural gas) | 1 | 1 |
| CO2 removal | DAC | High temperature DAC (electricity) | 1 | 1 |
| CO2 removal | DAC | Low temperature DAC (heat pump) | 1 | 1 |

Table S Parametrizations for DACCS Technologies.

| Technology | Scenario | Natural gas (GtCO2) | | Electricity (GtCO2) | | Non-energy cost (2015 $tCO2) | | Water (m3/tCO2) | |
| --- | --- | --- | --- | --- | --- | --- | --- | --- | --- |
| 2020 | 2030 | 2020 | 2030 | 2020 | 2030 | 2020 | 2030 |
| High temperature DACCS (natural gas) | SSP1-sustainable development | 8.1 | 5.3 | 1.8 | 1.3 | 296 | 185 | 4.7 | |
| SSP2-middle of the road |  | 5.3 |  | 1.3 |  | 185 |
| SSP5-fossil fueled development |  | 5.3 |  | 1.3 |  | 78 |
| High temperature DACCS (fully electric) | SSP1-sustainable development | _ | | 6 | 5 | 384 | 186 | 4.7 | |
| SSP2-middle of the road |  | 5 |  | 186 |
| SSP5-fossil fueled development |  | 5 |  | 101 |
| Low temperature DACCS (electric heat pump) | SSP1-sustainable development | _ | | 5.5 | 2.5 | 402 | 235 | _ | |
| SSP2-middle of the road |  | 2.5 |  | 235 |
| SSP5-fossil fueled development |  | 2.5 |  | 137 |

Values are assumed to remain constant after 2030 (Adapted from Ref. 3)

Fig. S 28 and 29 represent enhanced weathering supply curves for GCAM regions included and not included in Beerling et al. 28, respectively. Both figures are adapted from Ref. 23.


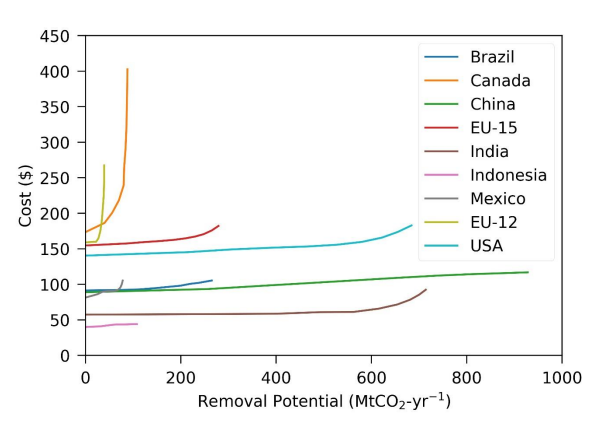


Fig. S Enhanced weathering supply curves for GCAM regions(a)


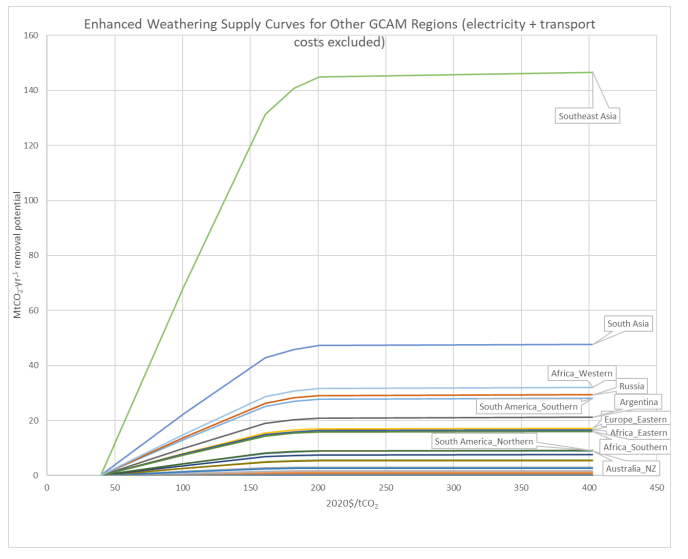


Fig. S Enhanced weathering supply curves for GCAM regions (b)

Table S 11 and 12 represents enhanced weathering cost adder and electrical energy inputs (Assumes rock comminution to 20 um) for enhanced weathering, respectively from Streffler et al. 29 and Adapted from Ref. 23.

Table S Enhanced Weathering Cost Adder

|  | Upper bound | Best estimate | Units |
| --- | --- | --- | --- |
| Investment | $14 | $6 | $/t rock |
| O&M | $59 | $26 | $/t rock |
| Total non-cost fuel | $73 | $31 | $/t rock |
| $242 | $104 | $/t CO2 |
| Difference between upper bound + best estimate (2020 cost adder for GCAM assumption; declines to zero by 2050) | $138 | | $/t CO2 |

Table S Electrical energy inputs for enhanced weathering

| Best estimate | 0.66 | GJ/tCO2 |
| --- | --- | --- |
| Lower bound | 0.23 | GJ/tCO2 |
| Upper bound | 2.03 | GJ/tCO2 |

Table S13 represents electrical energy input derivation for DORCS paired with reverse osmosis desalination. Non-fuel cost (based on Ref 30) and non-energy cost assumptions for DORCS are shown in Tables S14 and 15, respectively and they are adapted from Ref. 23. Similarly, GCAM’s assumption for DORCS (Adapted from Ref. 23) is shown in Table S16.

Table S Electrical Energy Input Derivation for DORCS paired with reverse osmosis desalination.

| Row | Value | Units | Source |
| --- | --- | --- | --- |
| 1 | 0.075 | kWh kg−1 CO2 captured (capture energy only;  standalone capture energy equal to this  value) | Ref. 30 |
| 2 | 277.77 | kWh/GJ | Unit conversion |
| 3 | 3.666667 | kgCO2/kgC | Unit conversion |
| 4 | 9.89E-04 | GJ electricity / kgC captured | Calculation  [1]/[2]*[3] |
| 5 | 13.1 | m3 ocean water / kg captured CO2 | ref |
| 6 | 48.03 | m3 ocean water / kg captured C | Calculation  [5]*[1] |
| 7 | 2.5 | m3 seawater processed / m3 desalinated  water produced | GCAM assumption |
| 8 | 5.15E-05 | GJ elec / m3 desalinated water (CO2 capture  only) | Calculation  [4]/[6]*[7] |
| 9 | 2.20E-02 - 6.30E-03 | GJ elec / m3 desalinated water (desalination) | GCAM assumption |

Table S Non-fuel costs of DORCS

| Ocean  capture  scenario | CapEx ($  kg−1CO2) | Non-fuel opex ($ kg−1 CO2) | | | Total  ($ kg−1 CO2) | GDP  deflator  from  2020 to  1975 | 1975 ($kg−1 C) |
| --- | --- | --- | --- | --- | --- | --- | --- |
| O&M | Labor, tax,  insurance | Replacements |
| Co-located | 0.18 | 0.05 | 0.06 | 0.18 | 0.47 | 3.79 | 0.45 |
| Stand-alone | 1.07 | 0.18 | 0.27 | 0.18 | 1.7 |  | 1.64 |

Table S Non-energy cost assumptions for DORCS paired with reverse osmosis desalination.

| Row | Description | Value | Units | Source |
| --- | --- | --- | --- | --- |
| 1 | non-fuel costs of CO2  capture for co-located  DORCS | 0.45 | 1975$/kgC | * |
| 2 | m3 ocean water / kg  captured C | 48.03 | m3/kgC | 30 |
| 3 | m3 seawater processed /  m3 desalinated water  produced | 2.5 | unitless | GCAM assumption |
| 4 | Non-energy cost adder for  CO2 capture | 0.023 | $1975/m3  desalinated water | Calculation  [1]/[2]*[3] |
| 5 | Non-fuel cost of  desalinated water (reverse  osmosis technology) | 0.38 | $1975/m3  desalinated water | GCAM assumption |
| 6 | Total non-fuel cost of  DORCS + reverse osmosis | 0.40 | $1975/m3  desalinated water | Calculation [4]+[5] |

*Based on Supplementary Table 2 from Ref. 23

Table S GCAM Assumptions for Direct Ocean Capture.

|  | Electricity input  (GJ/tCO2) | Non-fuel cost  (2020$/tCO2) |
| --- | --- | --- |
| Stand-alone | 16.5 | 1700 |
| Co-located with desalination  (carbon capture only) | 0.26 | 470 |

Table S17 represents biochar demand and supply assumptions (based on Ref. 31). Table is adapted from Ref. 23 .

Table S Biochar supply and demand assumptions

| Metric | Value | Unit | Source |
| --- | --- | --- | --- |
| Non-energy cost | 45.93 | 2007 USD per ton of feedstock | 32 |
| Biomass input | 3.65 | Tons of switchgrass per ton of  biochar |
| Natural gas input | 211.19 | MJ per dry ton of biochar |
| Syngas co-product | 20095 | MJ per dry ton of biochar |
| Net syngas co-product | 19884 | MJ per dry ton of biochar |
| Application rate | 10 - 20 | Tons of biochar per hectare | 33,34 |
| Yield improvements | 12 (tropical irrigated)  19 (tropical rainfed)  10 (temperate irrigated)  15 (temperate rainfed) | Percentage |  |
| Carbon sequestered | 70 | Percentage | 35 |

Selected equations are presented below, additional model underlying equations can be obtained directly from Ref. 27

**Technology or subsector share**

GCAM uses one of [two different logit formulations](http://jgcri.github.io/gcam-doc/choice.html#the-logit) to calculate the shares for each technology or subsector.

The first option, also known as the relative-cost-logit, is:

|  | (1) |
| --- | --- |

where  is the share of technology or subsector ,  is the share weight,  is the cost of technology or subsector , and  is the logit exponent.

The second option, also known as the absolute-cost-logit, is:

|  | (2) |
| --- | --- |

where  is the share of technology or subsector ,  is the share weight,  is the cost of technology or subsector , and  is the logit exponent.

**Transportation service demand**

The demand () for transportation services (e.g., passenger-km, tonne-km) in region  and time period  is given by the following equation:

|  | (3) |
| --- | --- |

Where  is the per-capita GDP,  is the total service price aggregated across all modes,  is the population, and  and  are income and price elasticities, respectively.

**Transportation subsector competition**

At the subsector level, the subsector competition may add the time value of transportation, as shown in the equation for the price () of mode , in region  and time period :

|  | (4) |
| --- | --- |

In the equation above,  refers to any of N technologies within subsector , and  is the share of technology  in subsector . Where this equation differs from the subsectors elsewhere in GCAM is the final term, the wage rate () multiplied by the “time value multiplier” (), divided by the average speed of the mode ().

**Transportation technology cost**

The costs of transportation technologies are computed as follows, for technology  in subsector , region , and time period :

|  | (5) |
| --- | --- |

In this equation,  stands for the fuel price,  is the vehicle fuel intensity, is the levelized non-fuel cost (expressed per vehicle-km), and is the load factor (persons or tonnes per vehicle).

**Direct Air Capture for Carbon Dioxide Removal**

We use GCAM’s (unmodified) logit choice model for economic choice between DACCS technologies. This includes the “choice” to not deploy DACCS and instead use other mitigation or negative emissions technologies (i.e., the “no-DAC” technology). The share  of any DACCS technology with price pi is computed as follows:

|  | (6) |
| --- | --- |

Where:

 = the shareweight of the technology.

 = the logit coefficient, which determines how large a cost difference is required to produce a given difference in market share.

**Total technology cost**

The total cost for a technology is the sum of the cost of the technology, the cost of its inputs, and any GHG value:

|  | (7) |
| --- | --- |

Where  is the total cost,  $ is the exogenously specified technology cost (capturing capital cost and operating & maintenance costs),  is the cost of input  (e.g., a fuel),  is the GHG value of gas , and  is the value of secondary output . Costs vary by region, technology, and year.

**Renewable resource supply**

The specific supply curve in each region for wind and solar is assigned three parameters, detailed in the following equation:

|  | (8) |
| --- | --- |

Where refers to the quantity of electricity produced, the price, and the remaining parameters are exogenous, with the names in the XML input files corresponding to the names in the equation above. indicates the maximum quantity of renewable energy that could be produced at any price, is a shape parameter, and indicates the price at which 50% of the maximum available resource is produced.

# References

1. Byers, E., Krey, V., Kriegler, E., Riahi, K. & Schaeffer, R. AR6 Scenario Explorer and Database hosted by IIASA. https://data.ece.iiasa.ac.at/ar6/#/workspaces/2123.

2. Carton, W., Hougaard, I.-M., Markusson, N. & Lund, J. F. Is carbon removal delaying emission reductions? *WIREs Clim. Change* **14**, e826 (2023).

3. Fuhrman, J. *et al.* The role of direct air capture and negative emissions technologies in the shared socioeconomic pathways towards +1.5 °C and +2 °C futures. *Environ. Res. Lett.* **16**, 114012 (2021).

4. Fuhrman, J. *et al.* Food–energy–water implications of negative emissions technologies in a +1.5 °C future. *Nat. Clim. Change* **10**, 920–927 (2020).

5. Realmonte, G. *et al.* An inter-model assessment of the role of direct air capture in deep mitigation pathways. *Nat. Commun.* **10**, 3277 (2019).

6. Newman, J., Bonino, C. A. & Trainham, J. A. The Energy Future. *Annu. Rev. Chem. Biomol. Eng.* **9**, 153–174 (2018).

7. Are renewable heating options cost-competitive with fossil fuels in the residential sector? – Analysis. *IEA* https://www.iea.org/articles/are-renewable-heating-options-cost-competitive-with-fossil-fuels-in-the-residential-sector (2021).

8. Williams, J. H. *et al.* Carbon-Neutral Pathways for the United States. *AGU Adv.* **2**, e2020AV000284 (2021).

9. IPCC. *Climate Change 2022: Mitigation of Climate Change. Contribution of Working Group III to the Sixth Assessment Report of the Intergovernmental Panel on Climate Change*. ([P.R. Shukla, J. Skea, R. Slade, A. Al Khourdajie, R. van Diemen, D. McCollum, M. Pathak, S. Some, P. Vyas, R. Fradera, M. Belkacemi, A. Hasija, G. Lisboa, S. Luz, J. Malley, (eds.)]. Cambridge University Press, Cambridge, UK and New York, NY, USA, 2022).

10. Williams, M., Reay, D. & Smith, P. Avoiding emissions versus creating sinks—Effectiveness and attractiveness to climate finance. *Glob. Change Biol.* **29**, 2046–2049 (2023).

11. Förster, J. *et al.* Framework for Assessing the Feasibility of Carbon Dioxide Removal Options Within the National Context of Germany. *Front. Clim.* **4**, (2022).

12. Qiu, Y., Cohen, S. & Suh, S. Decarbonization scenarios of the U.S. Electricity system and their costs. *Appl. Energy* **325**, 119679 (2022).

13. Sepulveda, N. A., Jenkins, J. D., de Sisternes, F. J. & Lester, R. K. The Role of Firm Low-Carbon Electricity Resources in Deep Decarbonization of Power Generation. *Joule* **2**, 2403–2420 (2018).

14. Cole, W. J. *et al.* Quantifying the challenge of reaching a 100% renewable energy power system for the United States. *Joule* **5**, 1732–1748 (2021).

15. Janipour, Z., de Nooij, R., Scholten, P., Huijbregts, M. A. J. & de Coninck, H. What are sources of carbon lock-in in energy-intensive industry? A case study into Dutch chemicals production. *Energy Res. Soc. Sci.* **60**, 101320 (2020).

16. Zhao, C., Dong, K., Zheng, S., Fu, X. & Wang, K. Can China’s aviation network development alleviate carbon lock-in? *Transp. Res. Part Transp. Environ.* **115**, 103578 (2023).

17. Seto, K. C. *et al.* Carbon Lock-In: Types, Causes, and Policy Implications. *Annu. Rev. Environ. Resour.* **41**, 425–452 (2016).

18. Chen, Y., Liu, K., Ni, L. & Chen, M. Impact of carbon lock-in on green economic efficiency: Evidence from Chinese provincial data. *Sci. Total Environ.* **892**, 164581 (2023).

19. Oh, D. & Lee, Y.-G. Productivity decomposition and economies of scale of Korean fossil-fuel power generation companies: 2001–2012. *Energy* **100**, 1–9 (2016).

20. IRENA. Renewable Power Remains Cost-Competitive amid Fossil Fuel Crisis. https://www.irena.org/news/pressreleases/2022/Jul/Renewable-Power-Remains-Cost-Competitive-amid-Fossil-Fuel-Crisis (2022).

21. Asayama, S. The Oxymoron of Carbon Dioxide Removal: Escaping Carbon Lock-In and yet Perpetuating the Fossil Status Quo? *Front. Clim.* **3**, (2021).

22. Baumgartner, T. CDReality: Is CDR a ‘Moral Hazard’? *OpenAir Collective* https://openaircollective.cc/cdreality-is-cdr-a-moral-hazard/ (2023).

23. Fuhrman, J. *et al.* Diverse carbon dioxide removal approaches could reduce impacts on the energy–water–land system. *Nat. Clim. Change* (2023) doi:10.1038/s41558-023-01604-9.

24. Wang, W., Khanna, N., Lin, J. & Liu, X. Black carbon emissions and reduction potential in China: 2015–2050. *J. Environ. Manage.* **329**, 117087 (2023).

25. Karthik, V., Vijay Bhaskar, B., Ramachandran, S. & Gertler, A. W. Quantification of organic carbon and black carbon emissions, distribution, and carbon variation in diverse vegetative ecosystems across India. *Environ. Pollut.* **309**, 119790 (2022).

26. Liu, H. *et al.* Deployment of hydrogen in hard-to-abate transport sectors under limited carbon dioxide removal (CDR): Implications on global energy-land-water system. *Renew. Sustain. Energy Rev.* **184**, 113578 (2023).

27. Bond-Lamberty, B. *et al.* JGCRI/gcam-core: GCAM 6.0. (2022) doi:10.5281/ZENODO.6619287.

28. Beerling, D. J. *et al.* Potential for large-scale CO2 removal via enhanced rock weathering with croplands. *Nature* **583**, 242–248 (2020).

29. Strefler, J., Amann, T., Bauer, N., Kriegler, E. & Hartmann, J. Potential and costs of carbon dioxide removal by enhanced weathering of rocks. *Environ. Res. Lett.* **13**, 034010 (2018).

30. Digdaya, I. A. *et al.* A direct coupled electrochemical system for capture and conversion of CO2 from oceanwater. *Nat. Commun.* **11**, 4412 (2020).

31. Bergero, C., Wise, M., Lamers, P., Wang, Y. & Weber, M. *Biochar as a carbon dioxide removal strategy in integrated long-run climate scenarios*. https://www.researchsquare.com/article/rs-1805544/v1 (2022) doi:10.21203/rs.3.rs-1805544/v1.

32. Roberts, K. G., Gloy, B. A., Joseph, S., Scott, N. R. & Lehmann, J. Life Cycle Assessment of Biochar Systems: Estimating the Energetic, Economic, and Climate Change Potential. *Environ. Sci. Technol.* **44**, 827–833 (2010).

33. Jeffery, S., Verheijen, F. G. A., Van Der Velde, M. & Bastos, A. C. A quantitative review of the effects of biochar application to soils on crop productivity using meta-analysis. *Agric. Ecosyst. Environ.* **144**, 175–187 (2011).

34. Ye, L. *et al.* Biochar effects on crop yields with and without fertilizer: A meta‐analysis of field studies using separate controls. *Soil Use Manag.* **36**, 2–18 (2020).

35. Wang, J., Xiong, Z. & Kuzyakov, Y. Biochar stability in soil: meta‐analysis of decomposition and priming effects. *GCB Bioenergy* **8**, 512–523 (2016).
